# Supplementary material
Source: PubMed Central journal article supplement (PMC8233946)
Supplement: jama-e219883-s001.pdf [file jama-e219883-s001.pdf]

## Supplemental Online Content

Wang L, Li X, Wang Z, et al. Trends in prevalence of diabetes and control of risk factors in diabetes among US adults, 1999-2018. *JAMA*. doi:10.1001/jama.2021.9883

|                                                                                                                                           |    |
|-------------------------------------------------------------------------------------------------------------------------------------------|----|
| eFigure. Trends in distribution of risk factors among US adults with diagnosed diabetes.....                                              | 2  |
| eTable 1. Trends in prevalence of diagnosed diabetes among US adults.....                                                                 | 4  |
| eTable 2. Trends in prevalence of undiagnosed diabetes among US adults.....                                                               | 6  |
| eTable 3. Trends in percent of diabetes that was undiagnosed among US adults .....                                                        | 8  |
| eTable 4. Trends in prevalence of achieving individualized hemoglobin A1c targets among US adults with diagnosed diabetes.....            | 10 |
| eTable 5. Trends in prevalence of achieving systolic/diastolic blood pressure <130/80 mm Hg among US adults with diagnosed diabetes ..... | 12 |
| eTable 6. Trends in prevalence of achieving low-density lipoprotein cholesterol <100 mg/dL among US adults with diagnosed diabetes .....  | 14 |
| eTable 7. Trends in prevalence of achieving hemoglobin A1c <7% among US adults with diagnosed diabetes.....                               | 16 |
| eTable 8. Trends in prevalence of achieving hemoglobin A1c <8% among US adults with diagnosed diabetes.....                               | 18 |
| eTable 9. Trends in prevalence of achieving systolic/diastolic blood pressure <140/90 mm Hg among US adults with diagnosed diabetes ..... | 20 |
| eTable 10. Trends in prevalence of statin use among US adults with diagnosed diabetes .....                                               | 22 |
| eTable 11. Factors associated with achieving selected risk factor control goals among US adults with diagnosed diabetes, 1999-2018 .....  | 24 |
| eTable 12. Trends in prevalence of diabetes including cases identified by 2-hour plasma glucose, 2005-2016 <sup>a</sup> .....             | 26 |

This supplemental material has been provided by the authors to give readers additional information about their work.

eFigure. Trends in distribution of risk factors among US adults with diagnosed diabetes

Shown are trends in distribution of hemoglobin A1c level (panel A), blood pressure level (panel B), low-density lipoprotein cholesterol level (panel C) and statin use (panel D). Two adjacent cycles were combined to produce robust estimates because this analysis was conducted among adults with diagnosed diabetes only. Weights were appropriately adjusted to obtain nationally representative estimates. Estimates were age standardized to all diagnosed diabetes cases other than during pregnancy in 1999-2018 years in the National Health and Nutrition Examination Survey using the age groups of 18-44 years, 45-64 years, and 65 years or greater. The sample sizes were 6052 for panel A, 6077 for panel B, 2451 for panel C and 6678 for panel D. P values were calculated using Rao-Scott chi-square tests. A p value <.05 indicates that the distribution differed significantly across years.

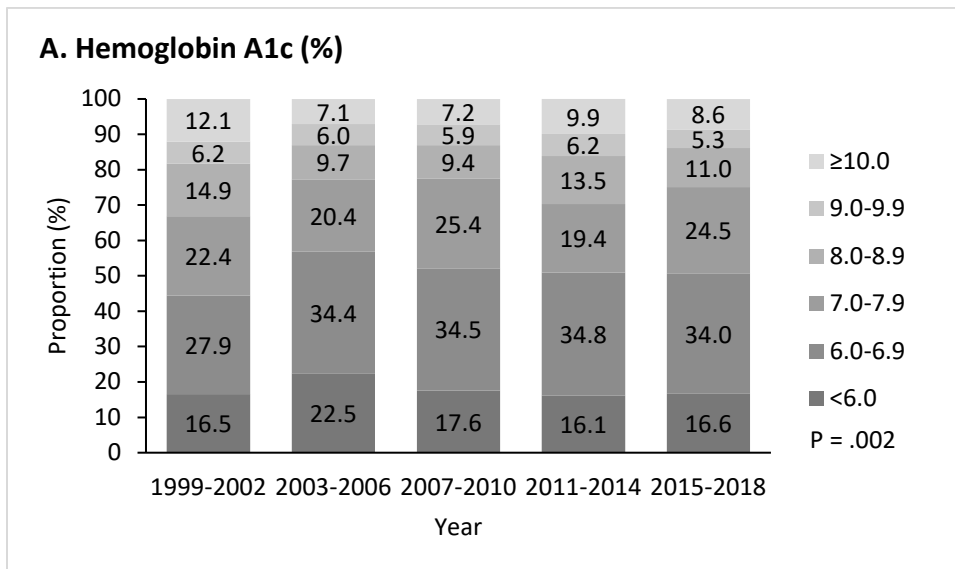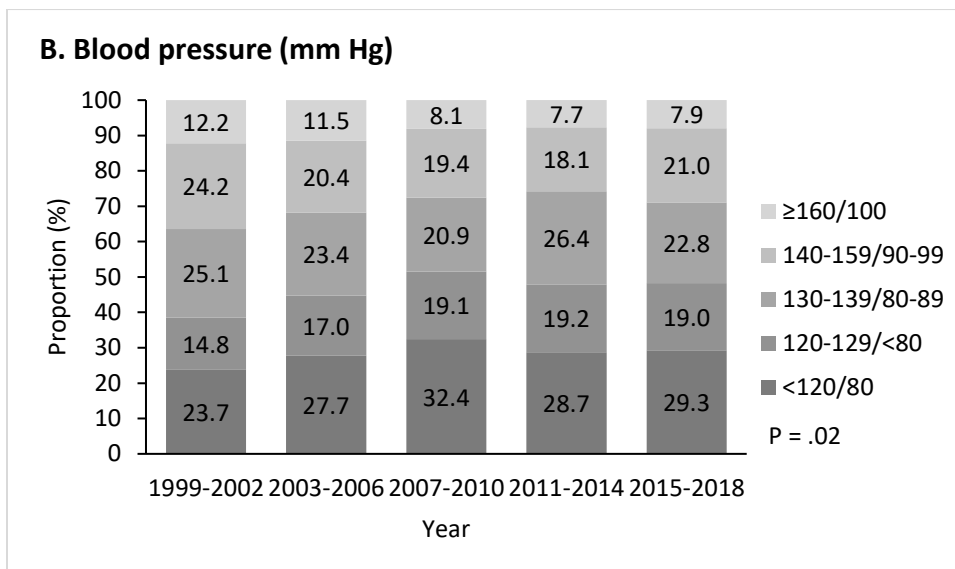

**C. Low-density lipoprotein cholesterol (mg/dL)**

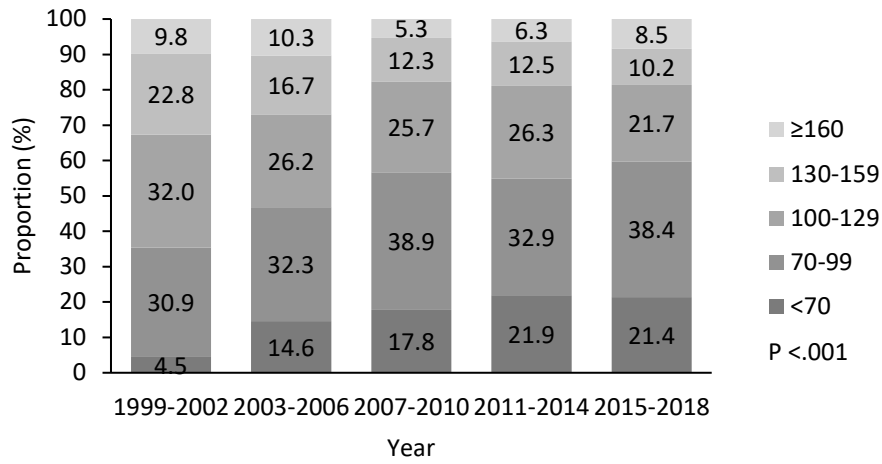

**D. On statin**

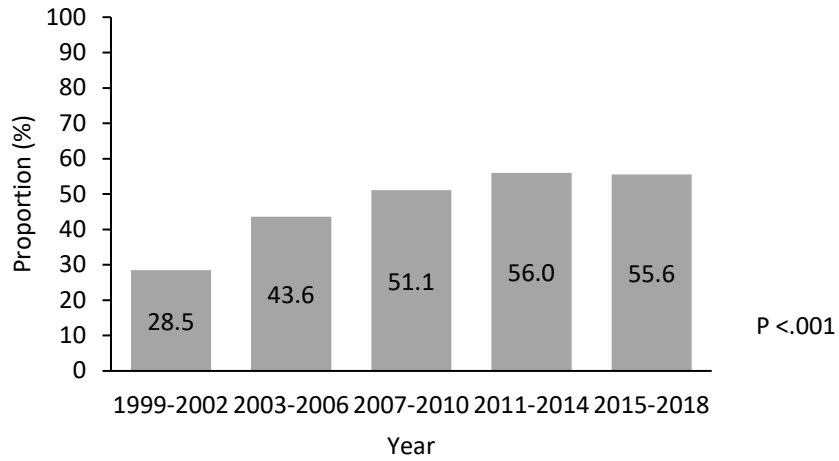

eTable 1. Trends in prevalence of diagnosed diabetes among US adults

|                                                                       | Adults with diagnosed diabetes, % (95% CI) <sup>a</sup> |                         |                         |                         |                         |                         |                         |                         |                         |                         |                                                              |                             |
|-----------------------------------------------------------------------|---------------------------------------------------------|-------------------------|-------------------------|-------------------------|-------------------------|-------------------------|-------------------------|-------------------------|-------------------------|-------------------------|--------------------------------------------------------------|-----------------------------|
|                                                                       | 1999-2000<br>(n = 2375)                                 | 2001-2002<br>(n = 2712) | 2003-2004<br>(n = 2539) | 2005-2006<br>(n = 2415) | 2007-2008<br>(n = 3018) | 2009-2010<br>(n = 3261) | 2011-2012<br>(n = 2900) | 2013-2014<br>(n = 3035) | 2015-2016<br>(n = 2923) | 2017-2018<br>(n = 2965) | Relative percent<br>change per 2-<br>year cycle <sup>b</sup> | P for<br>trend <sup>b</sup> |
| No. with diagnosed diabetes                                           | 481                                                     | 508                     | 544                     | 507                     | 760                     | 727                     | 706                     | 724                     | 843                     | 878                     |                                                              |                             |
| Overall prevalence                                                    | 6.8<br>(5.7-7.9)                                        | 7.3<br>(6.6-8.1)        | 8.4<br>(7.3-9.5)        | 8.0<br>(7.1-8.9)        | 8.9<br>(7.3-10.4)       | 8.7<br>(7.6-9.7)        | 9.4<br>(8.2-10.6)       | 10.0<br>(9.2-10.8)      | 10.8<br>(9.2-12.3)      | 11.0<br>(9.8-12.1)      | 5.2<br>(4.3 to 6.0)                                          | <.001                       |
| Age group, y                                                          |                                                         |                         |                         |                         |                         |                         |                         |                         |                         |                         |                                                              |                             |
| 18-44                                                                 | 1.6<br>(1.1-2.1)                                        | 2.7<br>(1.8-3.6)        | 2.1<br>(1.5-2.6)        | 2.8<br>(1.9-3.7)        | 2.3<br>(1.7-3.0)        | 2.1<br>(1.5-2.7)        | 2.6<br>(1.9-3.2)        | 2.7<br>(2.2-3.2)        | 3.4<br>(2.5-4.2)        | 2.8<br>(2.1-3.4)        | 4.7<br>(0.9 to 8.6)                                          | .02                         |
| 45-64                                                                 | 8.4<br>(6.7-10.0)                                       | 8.4<br>(6.5-10.3)       | 10.0<br>(8.2-11.9)      | 9.7<br>(7.9-11.6)       | 11.1<br>(8.2-14.0)      | 10.9<br>(8.9-12.9)      | 11.9<br>(9.8-13.9)      | 13.6<br>(11.1-16.2)     | 14.0<br>(11.8-16.2)     | 13.7<br>(10.7-16.7)     | 6.4<br>(5.1 to 7.7)                                          | <.001                       |
| ≥65                                                                   | 16.0<br>(12.9-19.0)                                     | 16.2<br>(14.0-18.4)     | 19.9<br>(16.1-23.7)     | 17.1<br>(15.1-19.1)     | 19.9<br>(17.1-22.7)     | 19.7<br>(16.9-22.4)     | 20.9<br>(17.9-23.9)     | 20.6<br>(17.7-23.5)     | 22.1<br>(17.6-26.6)     | 25.1<br>(21.6-28.6)     | 4.7<br>(3.1 to 6.4)                                          | <.001                       |
| Sex                                                                   |                                                         |                         |                         |                         |                         |                         |                         |                         |                         |                         |                                                              |                             |
| Men                                                                   | 7.2<br>(5.6-8.7)                                        | 7.6<br>(6.8-8.5)        | 8.4<br>(7.1-9.6)        | 7.6<br>(6.3-9.0)        | 9.0<br>(7.8-10.2)       | 9.4<br>(7.6-11.2)       | 10.1<br>(9.1-11.0)      | 10.4<br>(9.3-11.5)      | 12.7<br>(10.3-15.2)     | 12.5<br>(10.7-14.3)     | 6.2<br>(4.9 to 7.6)                                          | <.001                       |
| Women                                                                 | 6.5<br>(5.3-7.7)                                        | 7.0<br>(5.8-8.2)        | 8.4<br>(7.2-9.5)        | 8.4<br>(7.0-9.8)        | 8.8<br>(6.6-10.9)       | 8.0<br>(7.3-8.6)        | 8.9<br>(7.2-10.6)       | 9.7<br>(8.5-10.9)       | 9.2<br>(7.6-10.7)       | 9.7<br>(7.9-11.6)       | 3.8<br>(1.6 to 6.0)                                          | .003                        |
| Race/ethnicity <sup>c</sup>                                           |                                                         |                         |                         |                         |                         |                         |                         |                         |                         |                         |                                                              |                             |
| Non-Hispanic White                                                    | 5.3<br>(4.1-6.5)                                        | 6.0<br>(5.5-6.6)        | 7.3<br>(6.2-8.3)        | 6.4<br>(5.5-7.3)        | 7.5<br>(5.6-9.5)        | 6.9<br>(5.6-8.2)        | 7.7<br>(6.4-9.0)        | 8.7<br>(7.7-9.7)        | 8.8<br>(7.6-10.0)       | 10.0<br>(8.5-11.5)      | 5.9<br>(4.2 to 7.6)                                          | <.001                       |
| Non-Hispanic Black                                                    | 14.2<br>(11.3-17.0)                                     | 11.2<br>(8.8-13.6)      | 12.8<br>(10.5-15.0)     | 14.6<br>(12.6-16.5)     | 17.0<br>(14.8-19.3)     | 15.4<br>(12.8-17.9)     | 15.4<br>(13.5-17.4)     | 14.8<br>(13.3-16.2)     | 15.8<br>(13.5-18.2)     | 12.5<br>(9.9-15.1)      | 1.2<br>(-2.0 to 4.5)                                         | .41                         |
| Mexican American                                                      | 10.0<br>(8.3-11.8)                                      | 12.2<br>(9.9-14.5)      | 13.1<br>(10.3-15.9)     | 13.2<br>(10.8-15.6)     | 12.7<br>(10.7-14.7)     | 13.8<br>(11.1-16.4)     | 14.7<br>(10.3-19.2)     | 14.7<br>(12.4-17.0)     | 19.1<br>(16.2-21.9)     | 15.4<br>(12.4-18.3)     | 5.4<br>(2.9 to 7.9)                                          | <.001                       |
| Other                                                                 | 10.7<br>(6.8-14.6)                                      | 11.8<br>(7.5-16.1)      | 11.3<br>(7.1-15.4)      | 12.5<br>(7.5-17.5)      | 10.3<br>(7.2-13.4)      | 13.1<br>(9.9-16.4)      | 12.3<br>(9.2-15.4)      | 12.4<br>(10.2-14.7)     | 12.6<br>(9.7-15.6)      | 13.2<br>(11.7-14.7)     | 2.0<br>(0.7 to 3.4)                                          | .009                        |
| Education level <sup>d</sup>                                          |                                                         |                         |                         |                         |                         |                         |                         |                         |                         |                         |                                                              |                             |
| Less than High School                                                 | 10.7<br>(8.7-12.8)                                      | 10.1<br>(8.6-11.6)      | 12.1<br>(10.9-13.3)     | 12.6<br>(10.0-15.3)     | 13.1<br>(11.2-15.0)     | 12.6<br>(10.6-14.6)     | 12.8<br>(9.6-16.1)      | 12.7<br>(11.4-14.0)     | 16.3<br>(13.6-19.0)     | 15.1<br>(12.2-17.9)     | 3.6<br>(1.5 to 5.7)                                          | .004                        |
| High school graduate                                                  | 6.6<br>(5.0-8.2)                                        | 7.5<br>(6.1-8.8)        | 7.6<br>(6.0-9.3)        | 8.4<br>(7.0-9.8)        | 8.7<br>(5.8-11.7)       | 7.9<br>(6.0-9.7)        | 11.1<br>(8.1-14.1)      | 11.7<br>(10.0-13.3)     | 10.2<br>(8.2-12.2)      | 11.4<br>(8.5-14.3)      | 6.5<br>(4.0 to 9.0)                                          | <.001                       |
| Some college                                                          | 5.8<br>(3.1-8.5)                                        | 6.5<br>(5.3-7.6)        | 8.3<br>(6.1-10.4)       | 7.2<br>(5.7-8.6)        | 9.1<br>(6.6-11.6)       | 9.5<br>(7.8-11.1)       | 8.6<br>(6.3-10.8)       | 11.6<br>(9.6-13.5)      | 11.8<br>(9.3-14.2)      | 11.6<br>(9.3-13.9)      | 8.1<br>(5.7 to 10.7)                                         | <.001                       |
| College graduate or above                                             | 2.7<br>(1.9-3.6)                                        | 5.3<br>(3.4-7.2)        | 6.2<br>(4.6-7.8)        | 5.8<br>(4.0-7.6)        | 5.0<br>(3.7-6.4)        | 5.8<br>(3.8-7.8)        | 6.9<br>(4.8-9.0)        | 5.8<br>(4.3-7.3)        | 7.7<br>(5.6-9.9)        | 8.4<br>(6.3-10.5)       | 7.9<br>(2.6 to 13.6)                                         | .009                        |
| Weight group (body mass index range, kg/m <sup>2</sup> ) <sup>e</sup> |                                                         |                         |                         |                         |                         |                         |                         |                         |                         |                         |                                                              |                             |
| Normal weight (18.5-24.9)                                             | 3.5<br>(2.1-4.9)                                        | 4.1<br>(2.8-5.5)        | 4.8<br>(2.3-7.2)        | 3.9<br>(2.8-5.0)        | 4.7<br>(3.2-6.1)        | 3.5<br>(2.8-4.3)        | 4.8<br>(3.4-6.2)        | 4.1<br>(3.0-5.3)        | 4.9<br>(3.1-6.7)        | 4.4<br>(2.8-6.0)        | 1.8<br>(-1.9 to 5.6)                                         | .30                         |
| Overweight (25.0-29.9)                                                | 6.2<br>(4.2-8.1)                                        | 6.3<br>(4.8-7.7)        | 5.9<br>(4.1-7.6)        | 7.1<br>(5.8-8.5)        | 5.6<br>(4.5-6.6)        | 6.4<br>(4.7-8.1)        | 6.9<br>(5.7-8.0)        | 7.9<br>(6.5-9.3)        | 8.7<br>(7.0-10.5)       | 8.6<br>(7.0-10.3)       | 4.6<br>(1.7 to 7.6)                                          | .006                        |
| Class I obesity (30.0-34.9)                                           | 8.1<br>(6.2-10.0)                                       | 9.7<br>(7.4-12.0)       | 10.0<br>(8.3-11.8)      | 10.3<br>(7.6-12.9)      | 12.8<br>(10.3-15.4)     | 11.5<br>(9.1-13.9)      | 11.5<br>(8.8-14.1)      | 13.9<br>(11.1-16.6)     | 14.5<br>(11.6-17.3)     | 12.9<br>(10.6-15.1)     | 5.2<br>(2.9 to 7.5)                                          | <.001                       |
| Class II obesity (35.0-39.9)                                          | 14.3<br>(10.6-18.0)                                     | 11.8<br>(7.6-15.9)      | 20.7<br>(15.9-25.4)     | 14.2<br>(10.7-17.7)     | 17.5<br>(11.6-23.5)     | 16.5<br>(12.8-20.1)     | 16.3<br>(12.3-20.2)     | 20.2<br>(15.1-25.4)     | 15.3<br>(11.1-19.6)     | 18.0<br>(13.8-22.3)     | 1.9<br>(-2.1 to 6.1)                                         | .31                         |
| Class III obesity (≥40.0)                                             | 23.2<br>(17.9-28.6)                                     | 19.2<br>(12.4-26.0)     | 22.0<br>(13.9-30.0)     | 15.3<br>(11.9-18.7)     | 26.5<br>(17.1-35.9)     | 20.0<br>(16.0-24.0)     | 26.6<br>(19.9-33.4)     | 20.2<br>(12.9-27.5)     | 19.7<br>(14.7-24.7)     | 28.2<br>(18.8-37.5)     | 1.4<br>(-3.8 to 6.9)                                         | .55                         |

|                                                                       |                     |                   |                    |                    |                     |                    |                     |                     |                     |                     |                         |       |
|-----------------------------------------------------------------------|---------------------|-------------------|--------------------|--------------------|---------------------|--------------------|---------------------|---------------------|---------------------|---------------------|-------------------------|-------|
| Abdominal obesity status (waist circumference range, cm) <sup>f</sup> |                     |                   |                    |                    |                     |                    |                     |                     |                     |                     |                         |       |
| No ( $\leq 102$ cm in men, $\leq 88$ cm in women)                     | 3.3<br>(2.3-4.4)    | 4.6<br>(3.4-5.7)  | 4.5<br>(3.1-6.0)   | 3.6<br>(2.9-4.3)   | 4.3<br>(3.1-5.4)    | 3.8<br>(2.7-4.8)   | 4.7<br>(3.2-6.1)    | 4.1<br>(3.2-5.0)    | 6.5<br>(4.4-8.6)    | 5.6<br>(4.0-7.1)    | 3.9<br>(-0.4 to 8.4)    | .07   |
| Yes ( $> 102$ cm in men, $> 88$ cm in women)                          | 9.9<br>(8.0-11.8)   | 9.5<br>(8.5-10.4) | 10.4<br>(8.5-12.3) | 10.9<br>(9.3-12.5) | 11.6<br>(10.0-13.3) | 11.1<br>(9.9-12.4) | 11.9<br>(10.2-13.6) | 13.4<br>(12.4-14.4) | 12.7<br>(11.0-14.3) | 13.8<br>(12.0-15.6) | 4.6<br>(3.4 to 5.9)     | <.001 |
| Insurance status <sup>g</sup>                                         |                     |                   |                    |                    |                     |                    |                     |                     |                     |                     |                         |       |
| Uninsured                                                             | 16.9<br>(12.0-21.9) | 7.9<br>(2.9-12.9) | 5.2<br>(2.5-7.8)   | 4.7<br>(2.7-6.7)   | 9.8<br>(6.0-13.7)   | 6.4<br>(3.7-9.0)   | 10.2<br>(6.7-13.6)  | 8.1<br>(3.0-13.1)   | 11.5<br>(7.5-15.6)  | 10.6<br>(4.9-16.4)  | -3.0<br>(-20.5 to 18.5) | .77   |
| Insured                                                               | 6.5<br>(5.3-7.7)    | 7.3<br>(6.6-8.1)  | 8.4<br>(7.4-9.4)   | 8.3<br>(7.1-9.5)   | 8.9<br>(7.3-10.5)   | 8.8<br>(7.7-10.0)  | 9.3<br>(8.1-10.5)   | 10.4<br>(9.4-11.4)  | 10.9<br>(9.2-12.5)  | 11.2<br>(9.9-12.5)  | 5.4<br>(4.4 to 6.5)     | <.001 |

<sup>a</sup> Diagnosed diabetes was defined based on self-report of diabetes diagnosis by a doctor or other health professional. All estimates were age standardized to the 2017-2018 National Health and Nutrition Examination Survey non-pregnant adult population using the age groups of 18-44 years, 45-64 years, and 65 years or greater.

<sup>b</sup> Estimates were obtained from the Joinpoint Regression Program. A heteroscedastic and uncorrelated error joinpoint regression model was fitted allowing one joinpoint. The joinpoint location, if existed, was identified using a grid search. The best-fitting model was selected by conducting 4499 permutation tests based on a Monte Carlo method, adjusting for multiple tests. Parameters were estimated using weighted least squares, with weights proportional to the inverse of the variance of the prevalence rate at each cycle.

<sup>c</sup> Race/ethnicity was determined by self-report in fixed categories. Non-Hispanic Asians were not available before 2011 due to the survey design and thus estimates could not be presented separately. There was no missing data. All other racial and ethnic groups were grouped as "Other".

<sup>d</sup> Forty-two (0.1%) participants refused to report or did not know their education level. Education information was missing for one participant.

<sup>e</sup> Body mass index was computed by dividing weight in kilograms by height in meters squared. Estimates for those with body mass index  $< 18.5$  kg/m<sup>2</sup> were not presented due to small sample size. Body mass index was missing for 537 (1.9%) participants among 27,837 participants included from the examination population.

<sup>f</sup> Waist circumference was missing for 1276 (4.6%) participants among 27,837 participants included from the examination population.

<sup>g</sup> Of the 28,143 participants included from the interview population, 127 (0.5%) had missing insurance data. For the uninsured subgroup, the trend changed in 2003-2004. The presented estimate was the average relative percent change during the entire study period. The relative percent change per 2-year cycle between 1999-2000 and 2003-2004 was -43.3% (95% CI, -80.9% to 68.3%; *P* for trend=.24) and between 2003-2004 and 2017-2018 was 13.1% (95% CI, -0.6% to 28.8%; *P* for trend=0.06).

eTable 2. Trends in prevalence of undiagnosed diabetes among US adults

|                                                                       | Adults with undiagnosed diabetes, % (95% CI) <sup>a</sup> |                         |                         |                         |                         |                         |                         |                         |                         |                         |                                                              |                             |
|-----------------------------------------------------------------------|-----------------------------------------------------------|-------------------------|-------------------------|-------------------------|-------------------------|-------------------------|-------------------------|-------------------------|-------------------------|-------------------------|--------------------------------------------------------------|-----------------------------|
|                                                                       | 1999-2000<br>(n = 2375)                                   | 2001-2002<br>(n = 2712) | 2003-2004<br>(n = 2539) | 2005-2006<br>(n = 2415) | 2007-2008<br>(n = 3018) | 2009-2010<br>(n = 3261) | 2011-2012<br>(n = 2900) | 2013-2014<br>(n = 3035) | 2015-2016<br>(n = 2923) | 2017-2018<br>(n = 2965) | Relative percent<br>change per 2-<br>year cycle <sup>b</sup> | P for<br>trend <sup>b</sup> |
| No. with undiagnosed diabetes                                         | 127                                                       | 167                     | 136                     | 131                     | 235                     | 232                     | 207                     | 176                     | 179                     | 225                     |                                                              |                             |
| Overall prevalence                                                    | 3.0<br>(2.4-3.6)                                          | 3.6<br>(2.9-4.4)        | 3.5<br>(2.7-4.2)        | 2.9<br>(1.8-3.9)        | 3.9<br>(3.4-4.4)        | 3.6<br>(2.7-4.5)        | 3.1<br>(2.4-3.7)        | 2.7<br>(2.3-3.2)        | 3.1<br>(2.5-3.6)        | 3.4<br>(2.6-4.1)        | -1.6<br>(-4.9 to 1.9)                                        | .32                         |
| Age group, y                                                          |                                                           |                         |                         |                         |                         |                         |                         |                         |                         |                         |                                                              |                             |
| 18-44                                                                 | 1.1<br>(-0.2-2.3)                                         | 0.9<br>(0.6-1.2)        | 1.2<br>(0.5-1.9)        | 1.1<br>(0.4-1.8)        | 1.2<br>(0.6-1.7)        | 1.0<br>(0.7-1.3)        | 1.7<br>(1.1-2.4)        | 1.0<br>(0.7-1.2)        | 1.6<br>(0.9-2.4)        | 1.8<br>(1.1-2.6)        | 5.9<br>(-1.4 to 13.7)                                        | .10                         |
| 45-64                                                                 | 4.7<br>(3.2-6.2)                                          | 4.2<br>(2.3-6.0)        | 4.5<br>(2.9-6.2)        | 3.1<br>(1.3-5.0)        | 4.4<br>(3.3-5.4)        | 4.9<br>(2.8-7.0)        | 4.4<br>(3.0-5.8)        | 3.6<br>(2.6-4.6)        | 3.7<br>(2.1-5.3)        | 4.8<br>(2.7-6.8)        | -1.6<br>(-4.7 to 1.7)                                        | .30                         |
| ≥65                                                                   | 4.7<br>(2.8-6.5)                                          | 8.9<br>(6.7-11.1)       | 6.8<br>(4.5-9.0)        | 6.6<br>(3.7-9.5)        | 9.4<br>(7.3-11.6)       | 7.3<br>(5.2-9.4)        | 3.8<br>(2.5-5.2)        | 5.3<br>(3.8-6.9)        | 5.2<br>(3.5-6.9)        | 4.4<br>(2.7-6.1)        | -5.8<br>(-12.8 to 1.8)                                       | .11                         |
| Sex                                                                   |                                                           |                         |                         |                         |                         |                         |                         |                         |                         |                         |                                                              |                             |
| Men                                                                   | 3.4<br>(2.5-4.4)                                          | 4.8<br>(3.5-6.2)        | 4.6<br>(3.3-5.9)        | 3.6<br>(1.8-5.3)        | 5.0<br>(3.8-6.2)        | 5.1<br>(3.7-6.6)        | 3.5<br>(2.4-4.7)        | 3.6<br>(2.6-4.5)        | 3.4<br>(2.6-4.2)        | 3.3<br>(1.8-4.7)        | -2.5<br>(-6.9 to 2.1)                                        | .24                         |
| Women                                                                 | 2.7<br>(1.9-3.5)                                          | 2.6<br>(1.9-3.4)        | 2.4<br>(1.7-3.2)        | 2.2<br>(1.2-3.2)        | 3.0<br>(2.3-3.7)        | 2.3<br>(1.5-3.0)        | 2.6<br>(1.7-3.5)        | 2.0<br>(1.4-2.6)        | 2.6<br>(1.7-3.5)        | 3.5<br>(2.3-4.7)        | 0.3<br>(-4.0 to 4.8)                                         | .88                         |
| Race/ethnicity <sup>c</sup>                                           |                                                           |                         |                         |                         |                         |                         |                         |                         |                         |                         |                                                              |                             |
| Non-Hispanic White                                                    | 3.1<br>(2.3-3.8)                                          | 3.1<br>(2.4-3.9)        | 3.1<br>(2.1-4.1)        | 2.7<br>(1.4-4.0)        | 3.3<br>(2.5-4.2)        | 3.2<br>(2.0-4.4)        | 1.9<br>(1.2-2.6)        | 2.2<br>(1.5-2.9)        | 2.7<br>(2.0-3.4)        | 2.5<br>(1.4-3.6)        | -3.2<br>(-6.8 to 0.4)                                        | .07                         |
| Non-Hispanic Black                                                    | 3.3<br>(2.0-4.7)                                          | 5.8<br>(3.6-8.1)        | 3.1<br>(2.4-3.9)        | 4.2<br>(2.8-5.7)        | 5.8<br>(3.7-8.0)        | 3.7<br>(2.2-5.3)        | 5.2<br>(3.0-7.4)        | 3.4<br>(1.9-4.8)        | 3.0<br>(2.2-3.8)        | 5.8<br>(4.1-7.5)        | 1.2<br>(-6.0 to 8.9)                                         | .72                         |
| Mexican American                                                      | 3.4<br>(2.3-4.5)                                          | 4.2<br>(2.1-6.2)        | 3.6<br>(2.1-5.1)        | 5.4<br>(4.2-6.7)        | 5.8<br>(4.9-6.7)        | 7.4<br>(4.8-10.1)       | 5.7<br>(4.4-7.0)        | 3.9<br>(2.2-5.6)        | 5.3<br>(3.6-7.1)        | 6.2<br>(4.3-8.2)        | 4.6<br>(-1.2 to 10.8)                                        | .11                         |
| Other                                                                 | 2.8<br>(1.2-4.4)                                          | 4.2<br>(1.6-6.7)        | 5.5<br>(2.2-8.8)        | 0.9<br>(0.0-1.9)        | 4.9<br>(2.3-7.5)        | 3.8<br>(1.7-5.9)        | 6.0<br>(4.6-7.4)        | 4.2<br>(2.7-5.8)        | 3.9<br>(2.6-5.2)        | 4.2<br>(2.6-5.8)        | 2.1<br>(-7.2 to 12.3)                                        | .63                         |
| Education level <sup>d</sup>                                          |                                                           |                         |                         |                         |                         |                         |                         |                         |                         |                         |                                                              |                             |
| Less than High School                                                 | 4.4<br>(2.8-6.0)                                          | 6.0<br>(4.4-7.5)        | 4.6<br>(3.4-5.8)        | 3.7<br>(1.6-5.7)        | 4.8<br>(3.6-6.1)        | 4.3<br>(3.8-4.9)        | 5.7<br>(4.3-7.0)        | 3.3<br>(1.9-4.6)        | 3.9<br>(2.5-5.4)        | 4.5<br>(3.2-5.9)        | -2.1<br>(-6.4 to 2.5)                                        | .32                         |
| High school graduate                                                  | 4.0<br>(2.7-5.2)                                          | 3.2<br>(1.6-4.8)        | 3.0<br>(2.2-3.9)        | 3.8<br>(1.9-5.7)        | 5.3<br>(3.8-6.8)        | 4.1<br>(1.9-6.3)        | 3.6<br>(2.1-5.1)        | 2.9<br>(2.1-3.8)        | 3.7<br>(2.2-5.3)        | 3.5<br>(2.5-4.4)        | -0.9<br>(-5.8 to 4.2)                                        | .68                         |
| Some college                                                          | 2.0<br>(0.5-3.5)                                          | 3.4<br>(1.8-5.0)        | 3.5<br>(2.2-4.7)        | 2.7<br>(1.3-4.1)        | 4.3<br>(2.8-5.7)        | 3.2<br>(2.1-4.3)        | 2.3<br>(1.7-3.0)        | 3.2<br>(2.1-4.2)        | 2.7<br>(1.7-3.6)        | 2.9<br>(1.9-3.9)        | -2.2<br>(-7.7 to 3.7)                                        | .41                         |
| College graduate or above                                             | 1.5<br>(0.2-2.9)                                          | 2.1<br>(0.6-3.5)        | 3.0<br>(0.8-5.2)        | 1.7<br>(0.4-3.1)        | 1.4<br>(0.3-2.6)        | 3.1<br>(1.0-5.2)        | 1.9<br>(0.8-3.0)        | 1.7<br>(0.7-2.8)        | 2.7<br>(1.1-4.3)        | 3.2<br>(1.7-4.7)        | 4.8<br>(-2.7 to 12.9)                                        | .18                         |
| Weight group (body mass index range, kg/m <sup>2</sup> ) <sup>e</sup> |                                                           |                         |                         |                         |                         |                         |                         |                         |                         |                         |                                                              |                             |
| Normal weight (18.5-24.9)                                             | 1.3<br>(0.4-2.3)                                          | 1.0<br>(0.4-1.7)        | 1.7<br>(0.8-2.6)        | 1.2<br>(0.4-1.9)        | 1.0<br>(0.4-1.6)        | 2.0<br>(0.3-3.7)        | 1.1<br>(0.4-1.9)        | 1.2<br>(0.6-1.9)        | 1.5<br>(0.9-2.2)        | 1.1<br>(0.4-1.8)        | 0.3<br>(-5.0 to 5.9)                                         | .90                         |
| Overweight (25.0-29.9)                                                | 3.2<br>(2.0-4.4)                                          | 3.0<br>(1.8-4.1)        | 3.6<br>(2.6-4.6)        | 2.0<br>(0.6-3.3)        | 3.4<br>(2.5-4.4)        | 2.9<br>(1.9-3.8)        | 2.3<br>(1.3-3.2)        | 2.1<br>(1.3-2.8)        | 1.2<br>(0.5-1.9)        | 2.3<br>(0.8-3.8)        | -7.0<br>(-12.6 to -1.1)                                      | .03                         |
| Class I obesity (30.0-34.9)                                           | 5.4<br>(3.1-7.6)                                          | 5.9<br>(4.0-7.8)        | 5.2<br>(3.2-7.3)        | 3.2<br>(1.4-4.9)        | 5.2<br>(3.4-7.1)        | 4.4<br>(3.0-5.9)        | 3.9<br>(1.7-6.0)        | 3.5<br>(2.1-4.9)        | 5.7<br>(4.3-7.0)        | 3.4<br>(2.4-4.4)        | -2.9<br>(-7.9 to 2.3)                                        | .23                         |
| Class II obesity (35.0-39.9)                                          | 3.0<br>(0.9-5.2)                                          | 5.1<br>(2.3-8.0)        | 4.1<br>(1.2-6.9)        | 7.4<br>(1.6-13.1)       | 8.4<br>(5.4-11.3)       | 7.5<br>(4.6-10.3)       | 5.0<br>(2.4-7.7)        | 4.9<br>(3.2-6.6)        | 4.9<br>(2.3-7.4)        | 7.6<br>(3.9-11.2)       | 2.1<br>(-6.7 to 11.8)                                        | .61                         |
| Class III obesity (≥40.0)                                             | 6.1<br>(1.6-10.6)                                         | 13.8<br>(7.2-20.3)      | 2.8<br>(0.9-4.7)        | 9.8<br>(5.1-14.6)       | 11.4<br>(6.8-16.0)      | 6.6<br>(4.4-8.7)        | 11.6<br>(7.0-16.2)      | 7.6<br>(3.0-12.2)       | 5.3<br>(2.9-7.7)        | 8.9<br>(4.8-13.0)       | -2.1<br>(-13.4 to 10.7)                                      | .70                         |

|                                                                       |                  |                  |                  |                  |                  |                  |                  |                  |                  |                  |                       |      |
|-----------------------------------------------------------------------|------------------|------------------|------------------|------------------|------------------|------------------|------------------|------------------|------------------|------------------|-----------------------|------|
| Abdominal obesity status (waist circumference range, cm) <sup>f</sup> |                  |                  |                  |                  |                  |                  |                  |                  |                  |                  |                       |      |
| No ( $\leq$ 102 cm in men, $\leq$ 88 cm in women)                     | 1.3<br>(0.6-2.0) | 1.5<br>(0.9-2.2) | 2.2<br>(1.1-3.3) | 1.0<br>(0.4-1.6) | 1.6<br>(0.9-2.2) | 2.7<br>(1.1-4.4) | 1.6<br>(1.0-2.2) | 1.4<br>(0.9-1.9) | 1.6<br>(0.9-2.3) | 1.7<br>(0.6-2.7) | 0.5<br>(-5.6 to 6.9)  | .87  |
| Yes ( $>$ 102 cm in men, $>$ 88 cm in women)                          | 4.7<br>(3.7-5.6) | 5.4<br>(4.2-6.5) | 4.4<br>(3.3-5.6) | 4.3<br>(2.5-6.2) | 5.5<br>(4.6-6.4) | 4.2<br>(3.3-5.0) | 4.3<br>(3.3-5.3) | 3.7<br>(2.9-4.4) | 3.8<br>(3.0-4.5) | 4.5<br>(3.3-5.7) | -2.9<br>(-6.1 to 0.4) | .07  |
| Insurance status <sup>g</sup>                                         |                  |                  |                  |                  |                  |                  |                  |                  |                  |                  |                       |      |
| Uninsured                                                             | 3.0<br>(1.3-4.7) | 4.3<br>(1.4-7.2) | 2.9<br>(1.5-4.4) | 3.3<br>(1.3-5.4) | 4.3<br>(1.8-6.9) | 4.6<br>(2.5-6.7) | 6.7<br>(4.3-9.0) | 3.7<br>(0.7-6.7) | 4.0<br>(2.0-6.0) | 5.7<br>(3.1-8.2) | 6.8<br>(0.1 to 13.9)  | .047 |
| Insured                                                               | 2.9<br>(2.3-3.5) | 3.4<br>(2.7-4.1) | 3.3<br>(2.5-4.1) | 2.8<br>(1.6-3.9) | 3.6<br>(2.9-4.4) | 3.4<br>(2.3-4.4) | 2.6<br>(1.8-3.3) | 2.6<br>(2.2-3.1) | 3.1<br>(2.6-3.6) | 3.2<br>(2.3-4.2) | -0.9<br>(-3.7 to 1.9) | .47  |

<sup>a</sup> Undiagnosed diabetes was defined as having a hemoglobin A1c level of 6.5% or higher or fasting plasma glucose level of 126 mg/dL or higher among those without self-reported diabetes. All estimates were age standardized to the 2017-2018 National Health and Nutrition Examination Survey non-pregnant adult population using the age groups of 18-44 years, 45-64 years, and 65 years or greater.

<sup>b</sup> Estimates were obtained from the Joinpoint Regression Program. A heteroscedastic and uncorrelated error joinpoint regression model was fitted allowing one joinpoint. The joinpoint location, if existed, was identified using a grid search. The best-fitting model was selected by conducting 4499 permutation tests based on a Monte Carlo method, adjusting for multiple tests. Parameters were estimated using weighted least squares, with weights proportional to the inverse of the variance of the prevalence rate at each cycle.

<sup>c</sup> Race/ethnicity was determined by self-report in fixed categories. Non-Hispanic Asians were not available before 2011 due to the survey design and thus estimates could not be presented separately. There was no missing data. All other racial and ethnic groups were grouped as "Other".

<sup>d</sup> Forty-two (0.1%) participants refused to report or did not know their education level. Education information was missing for one participant.

<sup>e</sup> Body mass index was computed by dividing weight in kilograms by height in meters squared. Estimates for those with body mass index  $<$ 18.5 kg/m<sup>2</sup> were not presented due to small sample size. Body mass index was missing for 537 (1.9%) participants among 27,837 participants included from the examination population.

<sup>f</sup> Waist circumference was missing for 1276 (4.6%) participants among 27,837 participants included from the examination population.

<sup>g</sup> Of the 28,143 participants included from the interview population, 127 (0.5%) had missing insurance data.

eTable 3. Trends in percent of diabetes that was undiagnosed among US adults

|                                                                       | Adults with undiagnosed diabetes among those with diabetes, % (95% CI) <sup>a</sup> |                      |                      |                      |                      |                      |                      |                      |                       |                       |                                                              |                             |
|-----------------------------------------------------------------------|-------------------------------------------------------------------------------------|----------------------|----------------------|----------------------|----------------------|----------------------|----------------------|----------------------|-----------------------|-----------------------|--------------------------------------------------------------|-----------------------------|
|                                                                       | 1999-2000<br>(n=608)                                                                | 2001-2002<br>(n=675) | 2003-2004<br>(n=680) | 2005-2006<br>(n=638) | 2007-2008<br>(n=995) | 2009-2010<br>(n=959) | 2011-2012<br>(n=913) | 2013-2014<br>(n=900) | 2015-2016<br>(n=1022) | 2017-2018<br>(n=1103) | Relative percent<br>change per 2-<br>year cycle <sup>b</sup> | P for<br>trend <sup>b</sup> |
| No. with undiagnosed diabetes                                         | 127                                                                                 | 167                  | 136                  | 131                  | 235                  | 232                  | 207                  | 176                  | 179                   | 225                   |                                                              |                             |
| Overall percent                                                       | 31.0<br>(26.1-36.0)                                                                 | 33.1<br>(28.3-37.9)  | 29.6<br>(24.1-35.0)  | 26.2<br>(18.5-33.9)  | 30.5<br>(26.2-34.8)  | 29.5<br>(25.7-33.3)  | 24.1<br>(20.2-28.0)  | 21.4<br>(18.1-24.8)  | 21.8<br>(17.8-25.8)   | 23.3<br>(18.9-27.8)   | -4.6<br>(-6.8 to -2.3)                                       | .002                        |
| Age group, y                                                          |                                                                                     |                      |                      |                      |                      |                      |                      |                      |                       |                       |                                                              |                             |
| 18-44                                                                 | 39.7<br>(10.0-69.4)                                                                 | 25.3<br>(17.8-32.9)  | 37.0<br>(24.2-49.8)  | 27.3<br>(11.1-43.6)  | 33.2<br>(22.0-44.5)  | 32.4<br>(24.4-40.4)  | 40.0<br>(29.7-50.4)  | 26.3<br>(19.7-32.9)  | 32.7<br>(22.2-43.2)   | 40.0<br>(29.3-50.6)   | 2.2<br>(-2.8 to 7.4)                                         | .36                         |
| 45-64                                                                 | 36.0 (27.8-44.3)                                                                    | 33.2<br>(22.6-43.9)  | 31.1<br>(21.7-40.4)  | 24.4<br>(13.1-35.7)  | 28.1<br>(22.7-33.6)  | 30.9<br>(24.1-37.8)  | 26.9<br>(20.9-33.0)  | 20.8<br>(14.6-26.9)  | 20.9<br>(13.1-28.7)   | 25.8<br>(16.6-34.9)   | -4.9<br>(-7.6 to -2.1)                                       | .004                        |
| ≥65                                                                   | 22.6<br>(15.5-29.6)                                                                 | 35.6<br>(28.6-42.5)  | 25.3<br>(19.3-31.4)  | 27.8<br>(19.5-36.1)  | 32.1<br>(25.6-38.7)  | 27.0<br>(20.9-33.2)  | 15.5<br>(10.3-20.8)  | 20.6<br>(16.0-25.1)  | 19.0<br>(12.1-25.8)   | 14.9<br>(9.5-20.3)    | -6.7<br>(-12.1 to -1.1)                                      | .03                         |
| Sex <sup>c</sup>                                                      |                                                                                     |                      |                      |                      |                      |                      |                      |                      |                       |                       |                                                              |                             |
| Men                                                                   | 32.5<br>(24.2-40.8)                                                                 | 38.5<br>(31.6-45.3)  | 35.9<br>(27.8-44.0)  | 31.6<br>(18.9-44.3)  | 35.4<br>(29.8-41.1)  | 35.1<br>(30.6-39.7)  | 25.7<br>(19.9-31.5)  | 25.8<br>(19.8-31.7)  | 21.0<br>(15.8-26.1)   | 21.2<br>(13.4-29.0)   | -7.1<br>(-11.0 to -3.1)                                      | <.001                       |
| Women                                                                 | 29.7<br>(23.7-35.6)                                                                 | 27.5<br>(20.3-34.7)  | 22.8<br>(17.0-28.6)  | 20.3<br>(12.4-28.1)  | 25.3<br>(17.7-32.9)  | 22.2<br>(16.3-28.0)  | 22.2<br>(15.8-28.6)  | 16.8<br>(11.6-22.0)  | 22.4<br>(15.0-29.8)   | 25.2<br>(19.9-30.4)   | -1.4<br>(-7.6 to 5.2)                                        | .67                         |
| Race/ethnicity <sup>d</sup>                                           |                                                                                     |                      |                      |                      |                      |                      |                      |                      |                       |                       |                                                              |                             |
| Non-Hispanic White                                                    | 37.0<br>(29.3-44.7)                                                                 | 33.8<br>(28.7-38.9)  | 30.2<br>(22.4-37.9)  | 29.5<br>(18.0-41.0)  | 30.3<br>(23.0-37.6)  | 31.6<br>(24.8-38.4)  | 20.1<br>(13.9-26.3)  | 20.3<br>(14.4-26.2)  | 22.9<br>(16.4-29.4)   | 19.7<br>(12.5-26.9)   | -6.3<br>(-8.9 to -3.7)                                       | <.001                       |
| Non-Hispanic Black                                                    | 19.7<br>(14.4-25.0)                                                                 | 34.2<br>(23.4-44.9)  | 19.7<br>(15.3-24.0)  | 22.2<br>(17.0-27.5)  | 25.5<br>(19.2-31.9)  | 20.6<br>(12.2-29.0)  | 24.9<br>(19.2-30.5)  | 19.3<br>(11.9-26.6)  | 14.9<br>(10.2-19.5)   | 31.4<br>(22.9-39.9)   | 0.6<br>(-5.6 to 7.1)                                         | .84                         |
| Mexican American                                                      | 25.4<br>(18.0-32.9)                                                                 | 25.6<br>(15.2-36.0)  | 21.2<br>(13.7-28.8)  | 29.3<br>(23.0-35.6)  | 32.2<br>(27.3-37.0)  | 35.9<br>(26.2-45.6)  | 26.6<br>(19.7-33.4)  | 21.0<br>(13.2-28.9)  | 21.4<br>(15.7-27.0)   | 29.6<br>(20.4-38.7)   | -0.9<br>(-6.2 to 4.8)                                        | .72                         |
| Other                                                                 | 20.2<br>(12.1-28.2)                                                                 | 24.7<br>(11.9-37.5)  | 33.6<br>(14.7-52.5)  | 7.4<br>(-0.9-15.7)   | 33.6<br>(22.8-44.4)  | 22.9<br>(12.8-32.9)  | 32.6<br>(25.4-39.9)  | 26.0<br>(17.9-34.1)  | 23.7<br>(18.3-29.2)   | 24.9<br>(19.0-30.7)   | 0<br>(-6.0 to 6.3)                                           | .99                         |
| Education level <sup>e</sup>                                          |                                                                                     |                      |                      |                      |                      |                      |                      |                      |                       |                       |                                                              |                             |
| Less than High School                                                 | 29.0<br>(21.7-36.3)                                                                 | 36.2<br>(28.9-43.5)  | 26.9<br>(21.2-32.6)  | 23.0<br>(13.3-32.6)  | 27.2<br>(21.8-32.6)  | 25.8<br>(22.4-29.3)  | 30.3<br>(23.3-37.3)  | 20.6<br>(13.5-27.8)  | 19.3<br>(13.3-25.2)   | 21.8<br>(15.0-28.7)   | -4.5<br>(-7.9 to -0.9)                                       | .02                         |
| High school graduate                                                  | 37.4<br>(28.1-46.7)                                                                 | 29.9<br>(19.5-40.2)  | 27.5<br>(20.3-34.7)  | 31.7<br>(21.0-42.4)  | 38.3<br>(28.4-48.2)  | 34.1<br>(23.7-44.4)  | 23.7<br>(13.6-33.8)  | 20.3<br>(15.7-24.9)  | 24.9<br>(15.3-34.5)   | 23.5<br>(16.5-30.6)   | -5.3<br>(-9.5 to -0.8)                                       | .03                         |
| Some college                                                          | 24.3<br>(4.7-43.9)                                                                  | 34.7<br>(24.5-44.9)  | 30.2<br>(19.4-40.9)  | 27.6<br>(16.8-38.3)  | 31.8<br>(23.4-40.3)  | 25.3<br>(18.2-32.4)  | 20.2<br>(14.4-26.1)  | 21.5<br>(15.2-27.8)  | 18.2<br>(12.2-24.2)   | 20.1<br>(13.8-26.3)   | -7.2<br>(-10.2 to -4.1)                                      | <.001                       |
| College graduate or above                                             | 31.2<br>(15.1-47.3)                                                                 | 27.9<br>(12.9-42.9)  | 33.0<br>(15.4-50.7)  | 22.3<br>(8.4-36.2)   | 21.0<br>(8.4-33.7)   | 34.3<br>(25.0-43.7)  | 22.2<br>(12.5-31.8)  | 23.8<br>(12.5-35.1)  | 25.6<br>(11.6-39.7)   | 28.3<br>(18.4-38.2)   | -1.3<br>(-6.1 to 3.8)                                        | .56                         |
| Weight group (body mass index range, kg/m <sup>2</sup> ) <sup>f</sup> |                                                                                     |                      |                      |                      |                      |                      |                      |                      |                       |                       |                                                              |                             |
| Normal weight (18.5-24.9)                                             | 28.5<br>(14.3-42.6)                                                                 | 15.7<br>(9.0-22.4)   | 23.8<br>(7.9-39.6)   | 21.4<br>(6.9-36.0)   | 13.8<br>(9.1-18.5)   | 37.4<br>(25.0-49.8)  | 19.5<br>(8.9-30.1)   | 24.8<br>(15.0-34.6)  | 22.9<br>(13.3-32.5)   | 20.1<br>(8.3-31.8)    | 2.0<br>(-7.9 to 12.9)                                        | .67                         |
| Overweight (25.0-29.9)                                                | 33.1<br>(22.3-43.8)                                                                 | 31.7<br>(21.8-41.7)  | 40.4<br>(31.7-49.1)  | 21.9<br>(10.3-33.4)  | 35.7<br>(27.8-43.6)  | 30.2<br>(22.9-37.5)  | 26.5<br>(18.1-34.8)  | 20.9<br>(15.0-26.9)  | 11.7<br>(5.9-17.5)    | 22.2<br>(10.9-33.6)   | -7.8<br>(-13.7 to -1.6)                                      | .02                         |
| Class I obesity (30.0-34.9)                                           | 39.8<br>(27.9-51.8)                                                                 | 37.2<br>(29.4-45.0)  | 32.5<br>(23.4-41.7)  | 22.7<br>(9.8-35.6)   | 30.1<br>(22.4-37.8)  | 27.6<br>(20.3-34.9)  | 24.8<br>(12.8-36.8)  | 20.2<br>(14.0-26.4)  | 27.7<br>(20.9-34.6)   | 20.8<br>(15.1-26.5)   | -6.1<br>(-8.7 to -3.4)                                       | .001                        |
| Class II obesity (35.0-39.9)                                          | 17.3<br>(5.9-28.6)                                                                  | 31.0<br>(16.4-45.6)  | 17.3<br>(8.9-25.6)   | 34.4<br>(18.6-50.3)  | 31.2<br>(20.1-42.3)  | 31.3<br>(22.8-39.8)  | 19.6<br>(11.3-27.9)  | 18.3<br>(12.5-24.0)  | 23.0<br>(13.8-32.2)   | 29.3<br>(19.6-39.0)   | -0.8<br>(-8.4 to 7.5)                                        | .83                         |
| Class III obesity (≥40.0)                                             | 22.2<br>(8.9-35.4)                                                                  | 40.3<br>(23.7-56.8)  | 9.2<br>(1.9-16.5)    | 40.5<br>(29.7-51.2)  | 30.8<br>(14.5-47.1)  | 22.9<br>(15.6-30.2)  | 28.2<br>(19.3-37.1)  | 27.3<br>(12.6-41.9)  | 17.2<br>(12.1-22.4)   | 20.7<br>(12.0-29.4)   | -7.2<br>(-15.3 to 1.6)                                       | .09                         |



|                                                                       |                     |                     |                     |                     |                     |                     |                     |                     |                     |                     |                        |       |
|-----------------------------------------------------------------------|---------------------|---------------------|---------------------|---------------------|---------------------|---------------------|---------------------|---------------------|---------------------|---------------------|------------------------|-------|
| Abdominal obesity status (waist circumference range, cm) <sup>g</sup> |                     |                     |                     |                     |                     |                     |                     |                     |                     |                     |                        |       |
| No ( $\leq$ 102 cm in men, $\leq$ 88 cm in women)                     | 29.3<br>(16.7-41.9) | 24.6<br>(14.0-35.3) | 32.4<br>(18.7-46.2) | 21.4<br>(9.8-33.0)  | 25.6<br>(16.4-34.9) | 42.5<br>(33.7-51.2) | 24.5<br>(16.9-32.0) | 26.7<br>(17.7-35.6) | 20.2<br>(12.0-28.3) | 24.0<br>(15.2-32.7) | -2.2<br>(-9.9 to 6.3)  | .56   |
| Yes ( $>$ 102 cm in men, $>$ 88 cm in women)                          | 31.7<br>(26.1-37.2) | 36.3<br>(31.4-41.3) | 29.5<br>(23.2-35.7) | 28.2<br>(19.3-37.1) | 32.0<br>(26.8-37.2) | 27.1<br>(24.0-30.2) | 24.0<br>(19.5-28.5) | 21.4<br>(17.3-25.4) | 22.0<br>(18.0-26.1) | 23.3<br>(18.6-28.0) | -5.4<br>(-7.6 to -3.2) | <.001 |
| Insurance status <sup>h</sup>                                         |                     |                     |                     |                     |                     |                     |                     |                     |                     |                     |                        |       |
| Uninsured                                                             | 23.3<br>(16.5-30.1) | 36.3<br>(18.5-54.0) | 34.5<br>(12.0-56.9) | 44.5<br>(23.6-65.4) | 31.0<br>(14.8-47.2) | 42.5<br>(29.1-55.9) | 39.4<br>(25.6-53.2) | 30.5<br>(15.7-45.2) | 26.3<br>(15.3-37.3) | 34.9<br>(20.7-49.0) | 2.5<br>(-8.4 to 14.7)  | .70   |
| Insured                                                               | 31.3<br>(25.4-37.3) | 31.4<br>(26.9-35.9) | 28.4<br>(23.4-33.4) | 24.9<br>(16.6-33.2) | 28.8<br>(23.0-34.5) | 27.5<br>(22.8-32.2) | 21.6<br>(17.0-26.2) | 20.3<br>(16.7-23.9) | 21.8<br>(17.9-25.7) | 22.2<br>(16.8-27.6) | -5.0<br>(-6.8 to -3.0) | <.001 |

<sup>a</sup> Undiagnosed diabetes was defined as having a hemoglobin A1c level of 6.5% or higher or fasting plasma glucose level of 126 mg/dL or higher among those without self-reported diabetes. Diagnosed diabetes was defined based on self-report of diabetes diagnosis by a doctor or other health professional. Diabetes included both diagnosed and undiagnosed diabetes. All estimates were age standardized to all diabetes cases other than during pregnancy in the 2017-2018 National Health and Nutrition Examination Survey adult population using the age groups of 18-44 years, 45-64 years, and 65 years or greater.

<sup>b</sup> Estimates were obtained from the Joinpoint Regression Program. A heteroscedastic and uncorrelated error joinpoint regression model was fitted allowing one joinpoint. The joinpoint location, if existed, was identified using a grid search. The best-fitting model was selected by conducting 4499 permutation tests based on a Monte Carlo method, adjusting for multiple tests. Parameters were estimated using weighted least squares, with weights proportional to the inverse of the variance of the prevalence rate at each cycle.

<sup>c</sup> For men, the trend changed in 2009-2010. The presented estimate in the table was the average relative percent change during the entire study period. The relative percent change per 2-year cycle between 1999-2000 and 2009-2010 was -1.1% (95% CI, -6.3% to 4.3%; *P* for trend=.61), and between 2009-2010 and 2017-2018 was -14.1% (95% CI, -22.8% to -4.4%; *P* for trend=.01). For women, the trend changed in 2013-2014. The relative percent change per 2-year cycle between 1999-2000 and 2013-2014 was -5.7% (95% CI, -9.7% to -1.7%; *P* for trend=.02), and between 2013-2014 and 2017-2018 was 15.4% (95% CI, -19.1% to 64.6%; *P* for trend=.35).

<sup>d</sup> Race/ethnicity was determined by self-report in fixed categories. Non-Hispanic Asians were not available before 2011 due to the survey design and thus estimates could not be presented separately. There was no missing data. All other racial and ethnic groups were grouped as "Other".

<sup>e</sup> Twenty participants refused to report or did not know their education level.

<sup>f</sup> Body mass index was computed by dividing weight in kilograms by height in meters squared. Estimates for those with body mass index  $<$ 18.5 kg/m<sup>2</sup> were not presented due to small sample size. Body mass index was missing for 272 (3.3%) participants among 8187 participants included from the examination population.

<sup>g</sup> Waist circumference was missing for 679 (8.3%) participants among 8187 participants included from the examination population.

<sup>h</sup> Of the 8493 participants included from the interview population, 38 (0.4%) had missing insurance data. For the uninsured subgroup, the trend changed in 2005-2006. The presented estimate in the table was the average relative percent change during the entire study period. The relative percent change per 2-year cycle between 1999-2000 and 2005-2006 was 21.6% (95% CI, -16.6% to 77.4%; *P* for trend=.24), and between 2005-2006 and 2017-2018 was -6.0% (95% CI, -16.2% to 5.6%; *P* for trend=.23).

eTable 4. Trends in prevalence of achieving individualized hemoglobin A1c targets among US adults with diagnosed diabetes

|                                                                       | Adults with diagnosed diabetes, % (95% CI) <sup>a,b</sup> |                      |                       |                       |                       |                          |
|-----------------------------------------------------------------------|-----------------------------------------------------------|----------------------|-----------------------|-----------------------|-----------------------|--------------------------|
|                                                                       | 1999-2002<br>(n=849)                                      | 2003-2006<br>(n=937) | 2007-2010<br>(n=1350) | 2011-2014<br>(n=1324) | 2015-2018<br>(n=1592) | P for trend <sup>c</sup> |
| Overall prevalence                                                    | 58.9 (54.4-63.3)*                                         | 71.0 (67.6-74.5)     | 66.7 (62.6-70.8)      | 62.0 (58.3-65.6)      | 66.8 (63.2-70.4)      | .51                      |
| Age group, y                                                          |                                                           |                      |                       |                       |                       |                          |
| 18-44                                                                 | 37.2 (22.6-51.8)                                          | 42.3 (33.1-51.6)     | 41.0 (28.7-53.4)      | 40.6 (29.4-51.8)      | 53.0 (44.3-61.7)      | .08                      |
| 45-64                                                                 | 53.6 (46.7-60.6)                                          | 64.4 (58.5-70.3)     | 61.7 (55.5-67.9)      | 54.7 (49.9-59.6)      | 60.4 (53.1-67.7)      | .90                      |
| ≥65                                                                   | 72.4 (65.2-79.6)                                          | 88.5 (85.6-91.4)*    | 81.3 (77.4-85.3)      | 77.6 (72.7-82.4)      | 78.9 (74.5-83.2)      | .72                      |
| Sex                                                                   |                                                           |                      |                       |                       |                       |                          |
| Men                                                                   | 58.2 (52.5-63.8)                                          | 69.3 (64.1-74.5)     | 62.7 (56.7-68.7)      | 60.4 (55.6-65.3)      | 64.4 (59.3-69.4)      | .87                      |
| Women                                                                 | 59.5 (53.6-65.4)*                                         | 72.6 (67.2-78.0)     | 70.7 (66.5-74.8)      | 63.6 (59.8-67.4)*     | 69.9 (66.2-73.6)      | .30                      |
| Race/ethnicity <sup>d</sup>                                           |                                                           |                      |                       |                       |                       |                          |
| Non-Hispanic White                                                    | 63.6 (58.0-69.3)                                          | 74.9 (70.3-79.6)     | 67.3 (61.8-72.8)      | 63.7 (58.4-68.9)      | 71.5 (65.3-77.7)      | .73                      |
| Non-Hispanic Black                                                    | 51.8 (45.1-58.4)                                          | 60.3 (53.4-67.2)     | 66.2 (60.6-71.8)*     | 63.1 (58.7-67.5)      | 57.3 (51.6-63.0)      | .36                      |
| Mexican American                                                      | 49.7 (44.7-54.7)                                          | 57.4 (52.0-62.7)     | 59.1 (52.8-65.3)      | 55.7 (48.0-63.4)      | 54.5 (47.0-62.0)      | .73                      |
| Other                                                                 | 58.7 (45.5-72.0)                                          | 71.0 (59.4-82.6)     | 68.1 (58.5-77.8)      | 57.0 (49.1-64.9)      | 66.8 (61.4-72.2)      | .48                      |
| Education level <sup>e</sup>                                          |                                                           |                      |                       |                       |                       |                          |
| Less than High School                                                 | 58.5 (52.5-64.5)                                          | 60.2 (54.2-66.2)     | 66.0 (60.7-71.2)      | 64.4 (58.3-70.4)      | 63.2 (57.4-69.1)      | .23                      |
| High school graduate                                                  | 58.5 (51.8-65.3)                                          | 75.3 (69.6-81.1)     | 68.6 (61.6-75.6)      | 59.7 (53.4-65.9)      | 66.5 (59.5-73.4)      | .71                      |
| Some college                                                          | 57.1 (49.2-65.1)*                                         | 71.1 (64.7-77.6)     | 65.8 (59.4-72.2)      | 61.2 (55.4-67.0)      | 66.6 (61.0-72.2)      | .38                      |
| College graduate or above                                             | 67.1 (54.3-79.9)                                          | 82.4 (74.5-90.3)*    | 65.9 (55.2-76.6)      | 62.3 (54.2-70.5)      | 71.2 (63.7-78.6)      | .38                      |
| Weight group (body mass index range, kg/m <sup>2</sup> ) <sup>f</sup> |                                                           |                      |                       |                       |                       |                          |
| Normal weight (18.5-24.9)                                             | 50.6 (37.2-64.0)*                                         | 58.7 (48.4-69.0)     | 67.4 (58.6-76.1)      | 64.8 (54.4-75.2)      | 71.1 (61.4-80.8)      | .01                      |
| Overweight (25.0-29.9)                                                | 63.6 (54.1-73.1)                                          | 68.7 (62.6-74.9)     | 68.2 (60.5-76.0)      | 64.8 (59.6-69.9)      | 63.9 (57.2-70.6)      | .44                      |
| Class I obesity (30.0-34.9)                                           | 54.9 (46.4-63.4)*                                         | 72.0 (64.6-79.4)     | 62.7 (55.1-70.3)      | 61.9 (56.6-67.3)      | 67.7 (60.6-74.8)      | .42                      |
| Class II obesity (35.0-39.9)                                          | 54.8 (42.6-67.1)                                          | 76.3 (67.6-85.0)     | 70.1 (61.7-78.5)      | 62.7 (53.9-71.5)      | 68.2 (60.7-75.6)      | .10                      |
| Class III obesity (≥40.0)                                             | 67.3 (53.7-80.9)                                          | 73.1 (63.8-82.4)     | 69.9 (62.1-77.7)      | 52.4 (40.3-64.4)*     | 65.3 (57.9-72.7)      | .17                      |
| Abdominal obesity status (waist circumference range, cm) <sup>g</sup> |                                                           |                      |                       |                       |                       |                          |
| No (≤102 cm in men, ≤88 cm in women)                                  | 57.6 (47.3-68.0)                                          | 60.2 (50.4-69.9)     | 66.2 (57.0-75.4)      | 67.0 (59.3-74.7)      | 65.5 (59.4-71.6)      | .16                      |
| Yes (>102 cm in men, >88 cm in women)                                 | 58.2 (54.1-62.3)*                                         | 74.0 (70.3-77.7)*    | 67.1 (62.7-71.6)      | 61.3 (57.4-65.3)*     | 67.3 (63.4-71.2)      | .87                      |
| Insurance status <sup>h</sup>                                         |                                                           |                      |                       |                       |                       |                          |
| Uninsured                                                             | 49.2 (35.4-63.0)                                          | 59.7 (37.2-82.2)     | 58.8 (48.0-69.5)      | 54.0 (40.6-67.4)      | 58.4 (44.6-72.2)      | .64                      |
| Insured                                                               | 59.5 (54.6-64.5)*                                         | 72.0 (68.5-75.4)     | 67.7 (63.3-72.1)      | 62.7 (58.5-66.9)      | 67.4 (63.6-71.3)      | .64                      |
| Presence of complication <sup>i</sup>                                 |                                                           |                      |                       |                       |                       |                          |

|     |                   |                  |                  |                   |                  |     |
|-----|-------------------|------------------|------------------|-------------------|------------------|-----|
| No  | 54.3 (45.8-62.7)  | 68.1 (62.7-73.6) | 62.6 (56.1-69.1) | 61.0 (55.2-66.7)  | 62.1 (57.0-67.2) | .49 |
| Yes | 61.2 (55.2-67.1)* | 73.6 (68.3-78.9) | 69.4 (65.3-73.5) | 61.7 (57.3-66.1)* | 69.9 (65.1-74.7) | .69 |

<sup>a</sup> Diagnosed diabetes was defined based on self-report of diabetes diagnosis by a doctor or other health professional. Estimates were age standardized to all diagnosed diabetes cases other than during pregnancy in the National Health and Nutrition Examination Survey 1999-2018 years using the age groups of 18-44 years, 45-64 years, and 65 years or greater.

<sup>b</sup> Individualized hemoglobin A1c targets were <6.5% for young adults aged 18-44 years without complications, <7% for young adults with complications, <7% for middle-aged adults aged 45-64 years without complications, <8% for middle-aged adults with complication, <7.5% for older adults aged 65 years or greater without complications and <8% for older adults with complications, respectively.

<sup>c</sup> Assuming a linear trend.

<sup>d</sup> Race/ethnicity was determined by self-report in fixed categories. Non-Hispanic Asians were not available before 2011 due to the survey design and thus estimates could not be presented separately. All other racial and ethnic groups were grouped as “Other”.

<sup>e</sup> Eleven participants refused to report or did not know their education level.

<sup>f</sup> Body mass index was computed by dividing weight in kilograms by height in meters squared. Estimates for those with body mass index <18.5 kg/m<sup>2</sup> were not presented due to small sample size. Body mass index was missing for 189 participants.

<sup>g</sup> Waist circumference was missing for 475 participants.

<sup>h</sup> Insurance status was missing for 18 participants.

<sup>i</sup> Complications were defined as having self-reported cardiovascular disease (congestive heart failure, coronary heart disease, heart attack or stroke) or retinopathy or urine albumin-to-creatinine ratio ≥ 30 mg/g or estimated glomerular filtration rate <60 mL/min/1.73 m<sup>2</sup>.

\* Indicated *P* <.05 for comparing estimates in earlier years with the estimate in 2015-2018 within each stratum.

eTable 5. Trends in prevalence of achieving systolic/diastolic blood pressure <130/80 mm Hg among US adults with diagnosed diabetes

|                                                                       | Adults with diagnosed diabetes, % (95% CI) <sup>a</sup> |                      |                       |                       |                       | P for trend <sup>b</sup> |
|-----------------------------------------------------------------------|---------------------------------------------------------|----------------------|-----------------------|-----------------------|-----------------------|--------------------------|
|                                                                       | 1999-2002<br>(n=862)                                    | 2003-2006<br>(n=908) | 2007-2010<br>(n=1390) | 2011-2014<br>(n=1333) | 2015-2018<br>(n=1584) |                          |
| Overall prevalence                                                    | 38.5 (33.6-43.5)*                                       | 44.8 (39.9-49.6)     | 51.5 (48.0-55.1)      | 47.9 (44.1-51.6)      | 48.2 (44.6-51.8)      | 0.007                    |
| Age group, y                                                          |                                                         |                      |                       |                       |                       |                          |
| 18-44                                                                 | 48.9 (35.1-62.7)                                        | 61.2 (49.7-72.7)     | 59.3 (50.0-68.6)      | 55.3 (45.6-65.0)      | 57.3 (45.5-69.0)      | .65                      |
| 45-64                                                                 | 46.4 (39.0-53.7)                                        | 49.8 (42.4-57.2)     | 56.0 (50.6-61.3)      | 54.1 (48.9-59.3)      | 53.2 (48.5-57.9)      | .13                      |
| ≥65                                                                   | 26.1 (19.6-32.6)*                                       | 33.3 (27.4-39.2)     | 43.8 (39.2-48.4)      | 38.3 (33.3-43.4)      | 39.5 (34.9-44.1)      | .003                     |
| Sex                                                                   |                                                         |                      |                       |                       |                       |                          |
| Men                                                                   | 39.4 (34.0-44.8)*                                       | 49.4 (43.2-55.6)     | 53.7 (47.8-59.5)      | 44.4 (38.8-49.9)      | 47.2 (43.6-50.8)      | .50                      |
| Women                                                                 | 37.9 (29.5-46.3)*                                       | 41.1 (34.5-47.7)     | 49.7 (45.1-54.3)      | 50.7 (45.5-55.9)      | 49.0 (43.2-54.8)      | .008                     |
| Race/ethnicity <sup>c</sup>                                           |                                                         |                      |                       |                       |                       |                          |
| Non-Hispanic White                                                    | 43.6 (35.2-52.1)                                        | 46.2 (39.2-53.2)     | 53.7 (48.4-59.0)      | 48.8 (43.5-54.1)      | 47.9 (41.6-54.3)      | .24                      |
| Non-Hispanic Black                                                    | 30.1 (24.5-35.8)*                                       | 40.7 (33.5-47.9)     | 43.9 (39.7-48.0)*     | 38.6 (33.7-43.5)      | 37.5 (32.4-42.6)      | .31                      |
| Mexican American                                                      | 36.2 (31.1-41.2)*                                       | 50.9 (41.9-59.9)     | 48.1 (43.9-52.3)      | 42.8 (34.3-51.3)*     | 51.9 (46.3-57.5)      | .02                      |
| Other                                                                 | 36.9 (24.6-49.1)*                                       | 44.8 (32.6-56.9)     | 53.5 (44.7-62.3)      | 56.1 (48.2-64.0)      | 51.9 (47.3-56.4)      | .004                     |
| Education level <sup>d</sup>                                          |                                                         |                      |                       |                       |                       |                          |
| Less than High School                                                 | 32.8 (26.2-39.4)*                                       | 44.6 (37.5-51.6)     | 48.3 (43.6-53.0)      | 46.7 (39.9-53.4)      | 45.5 (39.8-51.2)      | .006                     |
| High school graduate                                                  | 40.0 (32.0-48.1)                                        | 42.8 (34.0-51.6)     | 48.0 (41.0-55.1)      | 42.5 (35.3-49.7)      | 46.8 (40.5-53.2)      | .26                      |
| Some college                                                          | 40.8 (31.9-49.8)                                        | 47.0 (39.5-54.5)     | 53.8 (47.4-60.2)      | 51.5 (43.7-59.3)      | 45.9 (38.4-53.5)      | .56                      |
| College graduate or above                                             | 47.3 (29.6-64.9)                                        | 50.1 (39.0-61.2)     | 59.6 (48.4-70.7)      | 52.4 (43.7-61.2)      | 52.8 (43.7-61.8)      | .59                      |
| Weight group (body mass index range, kg/m <sup>2</sup> ) <sup>e</sup> |                                                         |                      |                       |                       |                       |                          |
| Normal weight (18.5-24.9)                                             | 43.4 (31.5-55.3)                                        | 48.9 (32.8-65.0)     | 54.5 (45.9-63.0)      | 38.2 (27.1-49.3)      | 44.6 (31.3-58.0)      | .71                      |
| Overweight (25.0-29.9)                                                | 39.7 (31.8-47.7)*                                       | 46.1 (38.4-53.9)     | 49.8 (41.8-57.8)      | 56.2 (50.7-61.6)      | 56.5 (49.4-63.6)      | <.001                    |
| Class I obesity (30.0-34.9)                                           | 38.9 (30.2-47.6)*                                       | 48.2 (37.8-58.6)     | 55.1 (49.7-60.4)      | 48.5 (41.6-55.5)      | 51.3 (44.6-58.0)      | .20                      |
| Class II obesity (35.0-39.9)                                          | 30.0 (19.1-40.9)                                        | 38.1 (25.5-50.8)     | 51.3 (43.6-59.1)*     | 45.3 (33.4-57.2)      | 38.9 (30.5-47.4)      | .48                      |
| Class III obesity (≥40.0)                                             | 36.3 (22.8-49.8)                                        | 40.8 (28.9-52.7)     | 48.4 (40.6-56.2)      | 46.8 (36.2-57.3)      | 45.1 (35.7-54.4)      | .64                      |
| Abdominal obesity status (waist circumference range, cm) <sup>f</sup> |                                                         |                      |                       |                       |                       |                          |
| No (≤102 cm in men, ≤88 cm in women)                                  | 41.7 (34.4-49.0)                                        | 50.8 (41.0-60.7)     | 52.4 (45.4-59.3)      | 44.2 (35.8-52.7)      | 50.6 (41.6-59.5)      | .44                      |
| Yes (>102 cm in men, >88 cm in women)                                 | 37.4 (31.1-43.6)*                                       | 43.5 (38.1-49.0)     | 51.7 (47.4-56.0)      | 48.8 (44.5-53.2)      | 48.5 (44.1-52.8)      | .007                     |
| Insurance status <sup>g</sup>                                         |                                                         |                      |                       |                       |                       |                          |
| Uninsured                                                             | 30.7 (18.6-42.9)*                                       | 29.3 (21.2-37.4)     | 53.4 (41.9-64.8)      | 48.6 (35.4-61.8)      | 45.8 (30.3-61.3)      | .03                      |
| Insured                                                               | 40.4 (34.5-46.3)*                                       | 45.0 (40.3-49.8)     | 51.8 (47.7-55.9)      | 48.2 (44.3-52.0)      | 48.0 (43.8-52.2)      | .04                      |

| Presence of complication <sup>h</sup> |                   |                  |                  |                  |                  |     |
|---------------------------------------|-------------------|------------------|------------------|------------------|------------------|-----|
| No                                    | 46.2 (38.4-53.9)  | 50.4 (43.8-57.0) | 55.9 (49.2-62.5) | 55.8 (50.4-61.1) | 53.9 (48.0-59.7) | .17 |
| Yes                                   | 32.1 (26.3-38.0)* | 41.8 (35.0-48.7) | 48.0 (44.3-51.7) | 41.0 (36.0-45.9) | 42.9 (38.2-47.6) | .03 |

<sup>a</sup> Diagnosed diabetes was defined based on self-report of diabetes diagnosis by a doctor or other health professional. Estimates were age standardized to all diagnosed diabetes cases other than during pregnancy in the National Health and Nutrition Examination Survey 1999-2018 years using the age groups of 18-44 years, 45-64 years, and 65 years or greater.

<sup>b</sup> Assuming a linear trend.

<sup>c</sup> Race/ethnicity was determined by self-report in fixed categories. Non-Hispanic Asians were not available before 2011 due to the survey design and thus estimates could not be presented separately. There was no missing data. All other racial and ethnic groups were grouped as “Other”.

<sup>d</sup> Fourteen participants refused to report or did not know their education level.

<sup>e</sup> Body mass index was computed by dividing weight in kilograms by height in meters squared. Estimates for those with body mass index <18.5 kg/m<sup>2</sup> were not presented due to small sample size. Body mass index was missing for 183 participants.

<sup>f</sup> Waist circumference was missing for 455 participants.

<sup>g</sup> Insurance status was missing for 18 participants.

<sup>h</sup> Complications were defined as having self-reported cardiovascular disease (congestive heart failure, coronary heart disease, heart attack or stroke) or retinopathy or urine albumin-to-creatinine ratio ≥ 30 mg/g or estimated glomerular filtration rate <60 mL/min/1.73 m<sup>2</sup>.

\* Indicated  $P < .05$  for comparing estimates in earlier years with the estimate in 2015-2018 within each stratum.

eTable 6. Trends in prevalence of achieving low-density lipoprotein cholesterol <100 mg/dL among US adults with diagnosed diabetes

|                                                                       | Adults with diagnosed diabetes, % (95% CI) <sup>a</sup> |                      |                      |                      |                      |                          |
|-----------------------------------------------------------------------|---------------------------------------------------------|----------------------|----------------------|----------------------|----------------------|--------------------------|
|                                                                       | 1999-2002<br>(n=250)                                    | 2003-2006<br>(n=360) | 2007-2010<br>(n=578) | 2011-2014<br>(n=543) | 2015-2018<br>(n=720) | P for trend <sup>b</sup> |
| Overall prevalence                                                    | 35.4 (27.2-43.6)*                                       | 46.9 (40.8-52.9)*    | 56.6 (51.9-61.4)     | 54.8 (48.8-60.8)     | 59.7 (54.2-65.2)     | <.001                    |
| Age group, y                                                          |                                                         |                      |                      |                      |                      |                          |
| 18-44                                                                 | 42.5 (25.4-59.7)                                        | 37.7 (20.6-54.7)     | 50.2 (34.8-65.6)     | 38.0 (18.4-57.5)     | 38.7 (22.4-55.0)     | .78                      |
| 45-64                                                                 | 28.0 (18.4-37.6)*                                       | 44.3 (33.8-54.8)     | 52.8 (43.9-61.8)     | 48.4 (37.9-58.8)     | 54.1 (43.7-64.4)     | .005                     |
| ≥65                                                                   | 41.2 (25.4-57.0)*                                       | 52.9 (45.3-60.5)*    | 63.2 (56.4-69.9)*    | 68.0 (61.5-74.4)     | 73.5 (68.4-78.5)     | <.001                    |
| Sex                                                                   |                                                         |                      |                      |                      |                      |                          |
| Men                                                                   | 42.1 (32.4-51.7)*                                       | 52.9 (46.0-59.8)*    | 63.1 (56.8-69.4)     | 59.7 (52.9-66.5)     | 62.6 (56.3-69.0)     | <.001                    |
| Women                                                                 | 28.8 (19.7-38.0)*                                       | 42.0 (33.7-50.2)*    | 48.7 (41.8-55.6)     | 49.9 (41.8-58.0)     | 56.6 (48.4-64.7)     | <.001                    |
| Race/ethnicity <sup>c</sup>                                           |                                                         |                      |                      |                      |                      |                          |
| Non-Hispanic White                                                    | 38.2 (26.2-50.2)*                                       | 48.3 (39.7-56.9)*    | 63.6 (55.8-71.4)     | 56.2 (46.2-66.2)     | 63.7 (54.6-72.8)     | <.001                    |
| Non-Hispanic Black                                                    | 23.1 (14.1-32.2)*                                       | 54.0 (44.5-63.5)     | 38.2 (29.0-47.5)     | 50.0 (43.3-56.7)     | 52.5 (45.1-59.9)     | .055                     |
| Mexican American                                                      | 32.9 (19.8-45.9)*                                       | 33.2 (24.7-41.7)     | 48.0 (40.4-55.5)     | 40.5 (29.6-51.3)     | 49.5 (41.6-57.3)     | .04                      |
| Other                                                                 | 30.3 (7.5-53.1)*                                        | 48.0 (29.9-66.2)     | 52.5 (37.7-67.3)     | 59.7 (47.8-71.5)     | 59.1 (49.3-68.8)     | .02                      |
| Education level <sup>d</sup>                                          |                                                         |                      |                      |                      |                      |                          |
| Less than High School                                                 | 31.5 (18.5-44.6)*                                       | 44.9 (35.5-54.2)     | 50.0 (40.5-59.6)     | 49.7 (42.6-56.7)     | 50.7 (43.0-58.5)     | .02                      |
| High school graduate                                                  | 32.3 (13.7-50.9)                                        | 44.5 (34.2-54.7)     | 63.3 (53.5-73.2)     | 48.2 (36.6-59.9)     | 57.3 (44.8-69.7)     | .09                      |
| Some college                                                          | 29.9 (9.8-50.0)*                                        | 53.4 (42.0-64.8)     | 57.8 (47.9-67.6)     | 61.8 (49.8-73.8)     | 56.8 (44.7-68.9)     | .054                     |
| College graduate or above                                             | 55.7 (33.7-77.7)                                        | 40.9 (18.9-62.9)*    | 56.6 (43.4-69.8)*    | 58.9 (49.2-68.7)*    | 73.7 (63.4-84.0)     | .01                      |
| Weight group (body mass index range, kg/m <sup>2</sup> ) <sup>e</sup> |                                                         |                      |                      |                      |                      |                          |
| Normal weight (18.5-24.9)                                             | 36.2 (16.9-55.4)*                                       | 45.8 (33.1-58.5)*    | 58.5 (40.4-76.7)     | 64.7 (51.9-77.5)     | 69.0 (57.7-80.4)     | <.001                    |
| Overweight (25.0-29.9)                                                | 37.7 (22.4-52.9)*                                       | 37.1 (23.3-50.8)*    | 55.5 (43.3-67.7)     | 53.4 (42.5-64.2)     | 53.6 (43.3-64.0)     | .009                     |
| Class I obesity (30.0-34.9)                                           | 51.4 (31.6-71.1)                                        | 42.9 (33.8-52.0)     | 66.7 (55.1-78.2)     | 51.9 (43.2-60.6)     | 53.5 (42.6-64.4)     | .51                      |
| Class II obesity (35.0-39.9)                                          | 17.5 (1.5-33.6)                                         | 50.0 (37.4-62.6)     | 44.2 (37.2-51.2)     | 60.4 (45.4-75.4)     | 59.3 (48.9-69.8)     | .03                      |
| Class III obesity (≥40.0)                                             | 15.5 (0.5-30.6)*                                        | 64.4 (48.7-80.2)     | 48.3 (33.1-63.5)*    | 58.3 (48.8-67.8)*    | 63.6 (56.1-71.0)     | .04                      |
| Abdominal obesity status (waist circumference range, cm) <sup>f</sup> |                                                         |                      |                      |                      |                      |                          |
| No (≤102 cm in men, ≤88 cm in women)                                  | 34.9 (20.1-49.7)*                                       | 39.9 (25.9-53.9)*    | 59.9 (50.2-69.7)     | 62.3 (51.0-73.6)     | 60.0 (51.1-68.9)     | <.001                    |
| Yes (>102 cm in men, >88 cm in women)                                 | 36.8 (26.5-47.1)*                                       | 48.5 (40.7-56.4)*    | 55.8 (50.3-61.3)     | 53.9 (48.0-59.8)     | 60.0 (53.0-67.1)     | <.001                    |
| Insurance status <sup>g</sup>                                         |                                                         |                      |                      |                      |                      |                          |
| Uninsured                                                             | 43.6 (9.9-77.3)                                         | 31.4 (2.5-60.4)      | 55.0 (42.3-67.7)     | 57.5 (44.5-70.4)     | 56.5 (44.6-68.4)     | .66                      |
| Insured                                                               | 35.3 (26.8-43.8)*                                       | 49.5 (43.4-55.7)*    | 58.6 (53.1-64.1)     | 55.5 (48.9-62.1)     | 61.0 (55.5-66.4)     | <.001                    |
| Presence of complication <sup>h</sup>                                 |                                                         |                      |                      |                      |                      |                          |

|     |                   |                   |                  |                  |                  |       |
|-----|-------------------|-------------------|------------------|------------------|------------------|-------|
| No  | 32.7 (22.7-42.6)* | 42.7 (32.4-52.9)* | 52.9 (43.7-62.2) | 55.8 (45.6-65.9) | 62.9 (54.6-71.2) | <.001 |
| Yes | 36.3 (24.0-48.5)* | 53.2 (45.4-61.0)  | 60.6 (55.5-65.6) | 53.2 (46.7-59.7) | 56.3 (49.7-62.9) | .01   |

<sup>a</sup> Diagnosed diabetes was defined based on self-report of diabetes diagnosis by a doctor or other health professional. Estimates were age standardized to all diagnosed diabetes cases other than during pregnancy in the National Health and Nutrition Examination Survey 1999-2018 years using the age groups of 18-44 years, 45-64 years, and 65 years or greater.

<sup>b</sup> Assuming a linear trend.

<sup>c</sup> Race/ethnicity was determined by self-report in fixed categories. Non-Hispanic Asians were not available before 2011 due to the survey design and thus estimates could not be presented separately. There was no missing data. All other racial and ethnic groups were grouped as “Other”.

<sup>d</sup> Four participants refused to report or did not know their education level.

<sup>e</sup> Body mass index was computed by dividing weight in kilograms by height in meters squared. Estimates for those with body mass index <18.5 kg/m<sup>2</sup> were not presented due to small sample size. Body mass index was missing for 60 participants.

<sup>f</sup> Waist circumference was missing for 146 participants.

<sup>g</sup> Insurance status was missing for 5 participants.

<sup>h</sup> Complications were defined as having self-reported cardiovascular disease (congestive heart failure, coronary heart disease, heart attack or stroke) or retinopathy or urine albumin-to-creatinine ratio ≥ 30 mg/g or estimated glomerular filtration rate <60 mL/min/1.73 m<sup>2</sup>.

\* Indicated *P* <.05 for comparing estimates in earlier years with the estimate in 2015-2018 within each stratum.

eTable 7. Trends in prevalence of achieving hemoglobin A1c <7% among US adults with diagnosed diabetes

|                                                                       | Adults with diagnosed diabetes, % (95% CI) <sup>a</sup> |                      |                       |                       |                       |                          |
|-----------------------------------------------------------------------|---------------------------------------------------------|----------------------|-----------------------|-----------------------|-----------------------|--------------------------|
|                                                                       | 1999-2002<br>(n=849)                                    | 2003-2006<br>(n=937) | 2007-2010<br>(n=1350) | 2011-2014<br>(n=1324) | 2015-2018<br>(n=1592) | P for trend <sup>b</sup> |
| Overall prevalence                                                    | 44.5 (39.5-49.4)                                        | 56.8 (52.2-61.4)     | 52.1 (47.1-57.1)      | 50.9 (47.4-54.5)      | 50.6 (45.7-55.5)      | .78                      |
| Age group, y                                                          |                                                         |                      |                       |                       |                       |                          |
| 18-44                                                                 | 37.2 (22.6-51.8)*                                       | 49.5 (39.1-60.0)     | 43.1 (30.8-55.4)*     | 45.1 (34.2-56.0)*     | 59.6 (51.0-68.2)      | .02                      |
| 45-64                                                                 | 44.1 (36.9-51.3)                                        | 49.9 (42.4-57.3)     | 49.7 (42.8-56.6)      | 46.6 (42.5-50.7)      | 44.0 (37.8-50.2)      | .52                      |
| ≥65                                                                   | 47.4 (40.5-54.2)                                        | 67.2 (60.6-73.7)*    | 58.0 (52.6-63.4)      | 57.8 (51.7-64.0)      | 54.8 (49.0-60.7)      | .85                      |
| Sex                                                                   |                                                         |                      |                       |                       |                       |                          |
| Men                                                                   | 42.3 (36.4-48.2)                                        | 54.6 (48.6-60.7)     | 50.5 (43.6-57.5)      | 48.6 (43.8-53.5)      | 46.2 (39.2-53.1)      | .64                      |
| Women                                                                 | 46.0 (39.6-52.4)*                                       | 58.9 (53.2-64.6)     | 53.9 (49.0-58.7)      | 53.5 (49.5-57.5)      | 56.0 (51.1-60.9)      | .18                      |
| Race/ethnicity <sup>c</sup>                                           |                                                         |                      |                       |                       |                       |                          |
| Non-Hispanic White                                                    | 49.4 (42.4-56.4)                                        | 61.4 (55.2-67.7)     | 52.2 (45.7-58.8)      | 52.9 (47.9-57.9)      | 53.1 (44.9-61.3)      | .73                      |
| Non-Hispanic Black                                                    | 38.7 (32.8-44.6)*                                       | 46.4 (40.0-52.8)     | 51.8 (46.0-57.7)      | 50.4 (46.3-54.6)      | 47.6 (42.2-52.9)      | .03                      |
| Mexican American                                                      | 39.5 (34.6-44.4)                                        | 41.5 (35.7-47.4)     | 43.9 (37.4-50.3)      | 45.0 (38.2-51.8)      | 41.4 (33.5-49.3)      | .62                      |
| Other                                                                 | 38.6 (25.4-51.9)*                                       | 52.7 (39.2-66.2)     | 55.5 (45.5-65.5)      | 46.3 (39.5-53.0)      | 52.1 (46.5-57.8)      | .23                      |
| Education level <sup>d</sup>                                          |                                                         |                      |                       |                       |                       |                          |
| Less than High School                                                 | 39.8 (33.6-46.0)                                        | 42.7 (35.9-49.4)     | 50.4 (45.2-55.6)      | 56.3 (50.1-62.5)      | 48.9 (43.5-54.2)      | .004                     |
| High school graduate                                                  | 48.8 (40.7-56.9)                                        | 59.4 (49.5-69.3)*    | 54.4 (44.8-64.1)      | 45.9 (38.7-53.2)      | 45.7 (38.2-53.3)      | .07                      |
| Some college                                                          | 47.0 (40.4-53.6)                                        | 62.0 (53.4-70.5)     | 50.1 (43.1-57.0)      | 51.0 (44.7-57.3)      | 54.5 (45.1-64.0)      | .61                      |
| College graduate or above                                             | 47.7 (35.0-60.4)                                        | 69.3 (59.5-79.1)*    | 55.1 (43.9-66.3)      | 50.2 (42.6-57.8)      | 53.0 (44.2-61.7)      | .18                      |
| Weight group (body mass index range, kg/m <sup>2</sup> ) <sup>e</sup> |                                                         |                      |                       |                       |                       |                          |
| Normal weight (18.5-24.9)                                             | 42.3 (31.2-53.4)                                        | 47.5 (37.0-58.0)     | 55.1 (43.2-67.0)      | 55.2 (42.9-67.5)      | 53.3 (41.7-65.0)      | .17                      |
| Overweight (25.0-29.9)                                                | 47.5 (36.4-58.7)                                        | 55.4 (47.4-63.4)     | 58.2 (49.8-66.6)      | 55.7 (48.4-63.1)      | 49.1 (41.4-56.8)      | .82                      |
| Class I obesity (30.0-34.9)                                           | 40.9 (31.9-49.9)                                        | 57.5 (49.9-65.1)     | 47.4 (38.6-56.2)      | 49.6 (43.9-55.3)      | 52.1 (43.8-60.5)      | .59                      |
| Class II obesity (35.0-39.9)                                          | 41.9 (30.2-53.5)                                        | 61.5 (54.3-68.7)*    | 53.2 (44.1-62.3)      | 48.7 (38.0-59.3)      | 49.1 (40.1-58.2)      | .67                      |
| Class III obesity (≥40.0)                                             | 43.4 (30.0-56.9)                                        | 60.3 (48.0-72.5)     | 50.2 (40.0-60.4)      | 42.9 (32.6-53.3)      | 53.9 (46.1-61.8)      | .94                      |
| Abdominal obesity status (waist circumference range, cm) <sup>f</sup> |                                                         |                      |                       |                       |                       |                          |
| No (≤102 cm in men, ≤88 cm in women)                                  | 49.4 (38.4-60.4)                                        | 47.5 (37.7-57.3)     | 54.7 (43.9-65.5)      | 53.5 (45.1-61.9)      | 50.3 (42.1-58.5)      | .66                      |
| Yes (>102 cm in men, >88 cm in women)                                 | 41.8 (37.1-46.5)*                                       | 58.7 (53.7-63.7)*    | 51.7 (46.9-56.6)      | 50.8 (46.9-54.7)      | 50.7 (45.7-55.6)      | .71                      |
| Insurance status <sup>g</sup>                                         |                                                         |                      |                       |                       |                       |                          |
| Uninsured                                                             | 37.9 (21.1-54.7)                                        | 56.5 (34.6-78.4)     | 43.2 (29.8-56.5)      | 46.1 (32.5-59.8)      | 31.3 (19.7-42.9)      | .63                      |
| Insured                                                               | 44.6 (39.2-50.1)                                        | 57.3 (52.4-62.1)     | 53.0 (47.7-58.4)      | 51.8 (47.7-55.9)      | 51.6 (46.4-56.9)      | .70                      |
| Presence of complication <sup>h</sup>                                 |                                                         |                      |                       |                       |                       |                          |



|     |                  |                   |                  |                  |                  |     |
|-----|------------------|-------------------|------------------|------------------|------------------|-----|
| No  | 48.9 (40.0-57.8) | 61.8 (54.3-69.4)  | 55.6 (48.2-62.9) | 57.3 (51.1-63.5) | 58.3 (52.3-64.3) | .24 |
| Yes | 41.6 (35.9-47.2) | 53.3 (47.1-59.6)* | 47.3 (42.6-52.1) | 44.5 (40.2-48.8) | 44.6 (38.1-51.0) | .50 |

<sup>a</sup> Diagnosed diabetes was defined based on self-report of diabetes diagnosis by a doctor or other health professional. Estimates were age standardized to all diagnosed diabetes cases other than during pregnancy in the National Health and Nutrition Examination Survey 1999-2018 years using the age groups of 18-44 years, 45-64 years, and 65 years or greater.

<sup>b</sup> Assuming a linear trend.

<sup>c</sup> Race/ethnicity was determined by self-report in fixed categories. Non-Hispanic Asians were not available before 2011 due to the survey design and thus estimates could not be presented separately. There was no missing data. All other racial and ethnic groups were grouped as “Other”.

<sup>d</sup> Eleven participants refused to report or did not know their education level.

<sup>e</sup> Body mass index was computed by dividing weight in kilograms by height in meters squared. Estimates for those with body mass index <18.5 kg/m<sup>2</sup> were not presented due to small sample size. Body mass index was missing for 189 participants.

<sup>f</sup> Waist circumference was missing for 475 participants.

<sup>g</sup> Insurance status was missing for 18 participants.

<sup>h</sup> Complications were defined as having self-reported cardiovascular disease (congestive heart failure, coronary heart disease, heart attack or stroke) or retinopathy or urine albumin-to-creatinine ratio ≥ 30 mg/g or estimated glomerular filtration rate <60 mL/min/1.73 m<sup>2</sup>.

\* Indicated *P* <.05 for comparing estimates in earlier years with the estimate in 2015-2018 within each stratum.

eTable 8. Trends in prevalence of achieving hemoglobin A1c <8% among US adults with diagnosed diabetes

|                                                                       | Adults with diagnosed diabetes, % (95% CI) <sup>a</sup> |                      |                       |                       |                       |                          |
|-----------------------------------------------------------------------|---------------------------------------------------------|----------------------|-----------------------|-----------------------|-----------------------|--------------------------|
|                                                                       | 1999-2002<br>(n=849)                                    | 2003-2006<br>(n=937) | 2007-2010<br>(n=1350) | 2011-2014<br>(n=1324) | 2015-2018<br>(n=1592) | P for trend <sup>b</sup> |
| Overall prevalence                                                    | 66.8 (62.5-71.2)*                                       | 77.2 (73.9-80.6)     | 77.5 (74.2-80.8)      | 70.3 (67.0-73.6)*     | 75.1 (71.9-78.4)      | .27                      |
| Age group, y                                                          |                                                         |                      |                       |                       |                       |                          |
| 18-44                                                                 | 53.5 (40.3-66.7)                                        | 62.3 (52.3-72.4)     | 61.4 (50.2-72.6)      | 61.4 (50.9-71.9)      | 65.9 (56.7-75.1)      | .19                      |
| 45-64                                                                 | 63.8 (56.5-71.1)                                        | 70.6 (64.9-76.4)     | 76.5 (72.2-80.8)      | 64.9 (59.8-70.0)      | 71.6 (65.8-77.5)      | .51                      |
| ≥65                                                                   | 74.9 (67.6-82.3)                                        | 89.8 (87.0-92.6)*    | 84.3 (81.2-87.4)      | 79.5 (75.2-83.9)      | 82.3 (78.6-85.9)      | .99                      |
| Sex                                                                   |                                                         |                      |                       |                       |                       |                          |
| Men                                                                   | 67.0 (61.5-72.4)                                        | 75.5 (69.8-81.1)     | 74.5 (69.5-79.5)      | 69.8 (64.9-74.6)      | 74.0 (69.6-78.4)      | .45                      |
| Women                                                                 | 66.3 (60.5-72.1)*                                       | 78.8 (74.4-83.3)     | 80.5 (77.2-83.8)      | 70.8 (67.4-74.2)*     | 76.2 (73.1-79.4)      | .33                      |
| Race/ethnicity <sup>c</sup>                                           |                                                         |                      |                       |                       |                       |                          |
| Non-Hispanic White                                                    | 70.1 (64.3-76.0)*                                       | 81.2 (76.5-85.9)     | 79.4 (75.4-83.5)      | 71.7 (67.2-76.3)*     | 79.7 (74.5-84.9)      | .39                      |
| Non-Hispanic Black                                                    | 61.6 (56.4-66.8)                                        | 67.4 (61.4-73.5)     | 73.8 (69.3-78.4)*     | 71.2 (66.7-75.8)      | 66.5 (61.5-71.5)      | .26                      |
| Mexican American                                                      | 58.3 (52.2-64.5)                                        | 63.7 (58.5-68.9)     | 72.6 (65.1-80.0)      | 66.4 (59.7-73.0)      | 62.6 (55.2-69.9)      | .79                      |
| Other                                                                 | 67.4 (56.5-78.3)                                        | 75.3 (63.6-87.1)     | 75.1 (67.3-83.0)      | 66.8 (58.3-75.2)      | 74.8 (69.4-80.1)      | .46                      |
| Education level <sup>d</sup>                                          |                                                         |                      |                       |                       |                       |                          |
| Less than High School                                                 | 62.8 (56.8-68.8)                                        | 67.4 (61.3-73.6)     | 74.9 (70.1-79.7)      | 73.4 (67.9-78.9)      | 69.5 (64.1-75.0)      | .09                      |
| High school graduate                                                  | 65.6 (59.0-72.2)                                        | 79.8 (74.2-85.5)     | 78.2 (71.4-85.1)      | 67.0 (60.8-73.1)      | 70.8 (63.4-78.3)      | .47                      |
| Some college                                                          | 67.3 (59.3-75.4)                                        | 77.9 (72.1-83.6)     | 77.5 (72.5-82.5)      | 69.4 (63.6-75.2)      | 76.1 (70.7-81.4)      | .46                      |
| College graduate or above                                             | 76.8 (63.9-89.7)                                        | 86.8 (80.1-93.5)     | 79.4 (71.9-86.8)      | 72.1 (64.8-79.4)*     | 82.9 (77.4-88.3)      | .86                      |
| Weight group (body mass index range, kg/m <sup>2</sup> ) <sup>e</sup> |                                                         |                      |                       |                       |                       |                          |
| Normal weight (18.5-24.9)                                             | 61.8 (50.0-73.7)                                        | 70.1 (57.9-82.3)     | 76.5 (68.6-84.4)      | 72.7 (62.3-83.1)      | 76.2 (67.8-84.7)      | .09                      |
| Overweight (25.0-29.9)                                                | 71.3 (63.0-79.6)                                        | 73.7 (67.2-80.2)     | 77.7 (72.3-83.0)      | 72.1 (67.0-77.2)      | 73.2 (67.7-78.7)      | .90                      |
| Class I obesity (30.0-34.9)                                           | 59.1 (51.2-67.0)*                                       | 80.0 (72.8-87.2)     | 75.2 (68.2-82.2)      | 72.6 (66.3-78.9)      | 75.3 (68.6-82.1)      | .22                      |
| Class II obesity (35.0-39.9)                                          | 63.1 (51.1-75.1)                                        | 79.5 (71.2-87.7)     | 79.3 (72.4-86.3)      | 66.6 (57.4-75.9)      | 77.7 (71.0-84.3)      | .49                      |
| Class III obesity (≥40.0)                                             | 79.7 (68.8-90.6)                                        | 76.1 (67.1-85.0)     | 80.0 (72.4-87.7)      | 61.0 (48.6-73.3)*     | 73.2 (67.0-79.3)      | .08                      |
| Abdominal obesity status (waist circumference range, cm) <sup>f</sup> |                                                         |                      |                       |                       |                       |                          |
| No (≤102 cm in men, ≤88 cm in women)                                  | 66.9 (57.4-76.5)                                        | 69.9 (61.5-78.4)     | 77.5 (71.2-83.7)      | 76.2 (70.4-81.9)      | 75.3 (67.9-82.7)      | .16                      |
| Yes (>102 cm in men, >88 cm in women)                                 | 66.5 (62.1-70.9)*                                       | 79.1 (75.3-82.8)     | 78.0 (74.8-81.2)      | 69.8 (65.9-73.8)*     | 75.4 (72.0-78.8)      | .55                      |
| Insurance status <sup>g</sup>                                         |                                                         |                      |                       |                       |                       |                          |
| Uninsured                                                             | 53.1 (39.5-66.8)                                        | 62.0 (39.3-84.7)     | 69.5 (60.1-79.0)      | 59.8 (46.1-73.5)      | 62.7 (49.7-75.8)      | .51                      |
| Insured                                                               | 68.3 (63.6-73.0)*                                       | 78.6 (75.3-81.9)     | 78.5 (74.7-82.4)      | 71.6 (68.0-75.2)      | 76.2 (72.8-79.7)      | .40                      |
| Presence of complication <sup>h</sup>                                 |                                                         |                      |                       |                       |                       |                          |

|     |                   |                  |                  |                  |                  |     |
|-----|-------------------|------------------|------------------|------------------|------------------|-----|
| No  | 71.2 (64.4-78.1)* | 80.5 (77.0-84.0) | 83.2 (78.6-87.9) | 75.9 (70.6-81.1) | 80.6 (76.0-85.3) | .13 |
| Yes | 63.4 (57.8-68.9)  | 75.5 (70.0-81.1) | 71.4 (67.5-75.3) | 64.0 (59.4-68.5) | 70.3 (65.5-75.0) | .97 |

<sup>a</sup> Diagnosed diabetes was defined based on self-report of diabetes diagnosis by a doctor or other health professional. Estimates were age standardized to all diagnosed diabetes cases other than during pregnancy in the National Health and Nutrition Examination Survey 1999-2018 years using the age groups of 18-44 years, 45-64 years, and 65 years or greater.

<sup>b</sup> Assuming a linear trend.

<sup>c</sup> Race/ethnicity was determined by self-report in fixed categories. Non-Hispanic Asians were not available before 2011 due to the survey design and thus estimates could not be presented separately. There was no missing data. All other racial and ethnic groups were grouped as “Other”.

<sup>d</sup> Eleven participants refused to report or did not know their education level.

<sup>e</sup> Body mass index was computed by dividing weight in kilograms by height in meters squared. Estimates for those with body mass index <18.5 kg/m<sup>2</sup> were not presented due to small sample size. Body mass index was missing for 189 participants.

<sup>f</sup> Waist circumference was missing for 475 participants.

<sup>g</sup> Insurance status was missing for 18 participants.

<sup>h</sup> Complications were defined as having self-reported cardiovascular disease (congestive heart failure, coronary heart disease, heart attack or stroke) or retinopathy or urine albumin-to-creatinine ratio ≥ 30 mg/g or estimated glomerular filtration rate <60 mL/min/1.73 m<sup>2</sup>.

\* Indicated *P* <.05 for comparing estimates in earlier years with the estimate in 2015-2018 within each stratum.

eTable 9. Trends in prevalence of achieving systolic/diastolic blood pressure <140/90 mm Hg among US adults with diagnosed diabetes

|                                                                       | Adults with diagnosed diabetes, % (95% CI) <sup>a</sup> |                      |                       |                       |                       |                          |
|-----------------------------------------------------------------------|---------------------------------------------------------|----------------------|-----------------------|-----------------------|-----------------------|--------------------------|
|                                                                       | 1999-2002<br>(n=862)                                    | 2003-2006<br>(n=908) | 2007-2010<br>(n=1390) | 2011-2014<br>(n=1333) | 2015-2018<br>(n=1584) | P for trend <sup>b</sup> |
| Overall prevalence                                                    | 63.6 (59.3-67.9)*                                       | 68.2 (64.7-71.6)     | 72.5 (69.2-75.7)      | 74.3 (70.9-77.6)      | 71.1 (67.7-74.5)      | .004                     |
| Age group, y                                                          |                                                         |                      |                       |                       |                       |                          |
| 18-44                                                                 | 76.3 (65.0-87.6)                                        | 83.9 (76.8-91.0)     | 87.7 (81.4-94.0)      | 85.9 (79.3-92.6)      | 85.5 (78.5-92.6)      | .19                      |
| 45-64                                                                 | 73.4 (66.8-80.0)                                        | 74.7 (69.3-80.1)     | 75.6 (70.2-80.9)      | 75.8 (71.2-80.3)      | 76.8 (72.5-81.2)      | .36                      |
| ≥65                                                                   | 48.1 (42.2-54.0)*                                       | 55.4 (49.6-61.1)     | 63.6 (58.4-68.8)      | 68.5 (63.3-73.6)*     | 59.6 (54.8-64.3)      | .001                     |
| Sex                                                                   |                                                         |                      |                       |                       |                       |                          |
| Men                                                                   | 69.4 (64.1-74.6)                                        | 72.5 (67.0-78.1)     | 75.6 (70.9-80.3)      | 71.5 (67.2-75.8)      | 72.1 (67.5-76.7)      | .87                      |
| Women                                                                 | 59.1 (52.4-65.8)*                                       | 64.8 (61.4-68.3)     | 69.8 (66.3-73.3)      | 76.9 (71.8-82.0)*     | 69.6 (66.2-73.0)      | <.001                    |
| Race/ethnicity <sup>c</sup>                                           |                                                         |                      |                       |                       |                       |                          |
| Non-Hispanic White                                                    | 67.3 (61.5-73.1)                                        | 69.7 (64.7-74.6)     | 76.2 (71.8-80.6)      | 75.8 (70.7-80.8)      | 72.7 (66.8-78.6)      | .07                      |
| Non-Hispanic Black                                                    | 52.5 (45.7-59.2)                                        | 64.1 (59.1-69.2)     | 61.9 (57.2-66.7)      | 65.0 (60.9-69.0)      | 59.3 (53.2-65.3)      | .30                      |
| Mexican American                                                      | 60.1 (53.9-66.2)*                                       | 67.7 (59.7-75.7)     | 67.3 (62.4-72.3)*     | 72.6 (62.1-83.1)      | 73.4 (67.8-78.9)      | .001                     |
| Other                                                                 | 66.6 (52.4-80.8)                                        | 67.8 (55.9-79.7)     | 74.9 (67.1-82.6)      | 78.0 (70.7-85.2)      | 72.8 (68.8-76.8)      | .28                      |
| Education level <sup>d</sup>                                          |                                                         |                      |                       |                       |                       |                          |
| Less than High School                                                 | 55.3 (48.9-61.6)*                                       | 66.4 (61.6-71.2)     | 68.6 (63.9-73.2)      | 73.1 (67.1-79.0)      | 70.0 (64.5-75.5)      | <.001                    |
| High school graduate                                                  | 67.6 (59.2-75.9)                                        | 65.8 (58.8-72.9)     | 70.7 (64.9-76.6)      | 71.7 (66.1-77.4)      | 71.7 (65.5-78.0)      | .20                      |
| Some college                                                          | 69.0 (62.3-75.8)                                        | 69.4 (63.3-75.5)     | 72.8 (66.8-78.8)      | 80.7 (75.3-86.2)*     | 67.3 (60.1-74.5)      | .99                      |
| College graduate or above                                             | 69.9 (57.5-82.3)                                        | 74.5 (62.6-86.3)     | 82.0 (73.3-90.6)      | 70.9 (62.8-79.0)      | 75.7 (68.3-83.0)      | .86                      |
| Weight group (body mass index range, kg/m <sup>2</sup> ) <sup>e</sup> |                                                         |                      |                       |                       |                       |                          |
| Normal weight (18.5-24.9)                                             | 69.1 (62.9-75.4)                                        | 70.5 (58.2-82.8)     | 69.9 (59.7-80.1)      | 64.2 (54.8-73.5)      | 72.5 (64.6-80.3)      | .90                      |
| Overweight (25.0-29.9)                                                | 64.8 (58.1-71.4)                                        | 63.8 (56.9-70.7)     | 71.2 (65.1-77.4)      | 80.7 (76.2-85.2)*     | 71.6 (65.3-77.8)      | .02                      |
| Class I obesity (30.0-34.9)                                           | 67.8 (59.2-76.4)                                        | 70.2 (63.1-77.3)     | 76.4 (71.0-81.9)      | 75.9 (70.2-81.6)      | 74.6 (68.1-81.1)      | .25                      |
| Class II obesity (35.0-39.9)                                          | 55.2 (43.7-66.8)                                        | 71.0 (60.4-81.5)     | 71.6 (64.6-78.5)      | 73.0 (63.9-82.2)      | 66.6 (59.4-73.8)      | .45                      |
| Class III obesity (≥40.0)                                             | 59.0 (45.5-72.5)                                        | 68.4 (55.3-81.6)     | 69.1 (59.8-78.4)      | 76.2 (67.5-84.8)      | 72.4 (64.5-80.3)      | .11                      |
| Abdominal obesity status (waist circumference range, cm) <sup>f</sup> |                                                         |                      |                       |                       |                       |                          |
| No (≤102 cm in men, ≤88 cm in women)                                  | 69.7 (63.3-76.2)                                        | 72.9 (63.9-82.0)     | 71.5 (65.0-78.0)      | 70.4 (63.8-77.1)      | 75.5 (69.0-81.9)      | .39                      |
| Yes (>102 cm in men, >88 cm in women)                                 | 62.0 (56.4-67.7)*                                       | 67.0 (62.2-71.8)     | 73.3 (69.5-77.2)      | 74.9 (71.4-78.5)      | 70.7 (66.2-75.3)      | .01                      |
| Insurance status <sup>g</sup>                                         |                                                         |                      |                       |                       |                       |                          |
| Uninsured                                                             | 48.9 (37.9-59.9)                                        | 45.3 (35.3-55.4)     | 66.8 (54.0-79.7)      | 76.6 (65.6-87.6)      | 62.2 (46.1-78.2)      | .03                      |
| Insured                                                               | 65.7 (61.1-70.2)*                                       | 69.0 (65.5-72.4)     | 73.4 (69.7-77.0)      | 74.1 (70.8-77.4)      | 71.7 (68.1-75.4)      | .02                      |
| Presence of complication <sup>h</sup>                                 |                                                         |                      |                       |                       |                       |                          |

|     |                   |                   |                  |                  |                  |     |
|-----|-------------------|-------------------|------------------|------------------|------------------|-----|
| No  | 77.2 (70.8-83.6)  | 71.0 (64.6-77.4)* | 79.2 (72.6-85.9) | 80.8 (75.6-86.0) | 79.0 (74.9-83.1) | .23 |
| Yes | 54.2 (48.1-60.2)* | 67.7 (62.9-72.4)  | 66.9 (62.8-70.9) | 68.3 (63.3-73.4) | 65.7 (61.3-70.1) | .01 |

<sup>a</sup> Diagnosed diabetes was defined based on self-report of diabetes diagnosis by a doctor or other health professional. Estimates were age standardized to all diagnosed diabetes cases other than during pregnancy in the National Health and Nutrition Examination Survey 1999-2018 years using the age groups of 18-44 years, 45-64 years, and 65 years or greater.

<sup>b</sup> Assuming a linear trend.

<sup>c</sup> Race/ethnicity was determined by self-report in fixed categories. Non-Hispanic Asians were not available before 2011 due to the survey design and thus estimates could not be presented separately. There was no missing data. All other racial and ethnic groups were grouped as “Other”.

<sup>d</sup> Fourteen participants refused to report or did not know their education level.

<sup>e</sup> Body mass index was computed by dividing weight in kilograms by height in meters squared. Estimates for those with body mass index <18.5 kg/m<sup>2</sup> were not presented due to small sample size. Body mass index was missing for 183 participants.

<sup>f</sup> Waist circumference was missing for 455 participants.

<sup>g</sup> Insurance status was missing for 18 participants.

<sup>h</sup> Complications were defined as having self-reported cardiovascular disease (congestive heart failure, coronary heart disease, heart attack or stroke) or retinopathy or urine albumin-to-creatinine ratio ≥ 30 mg/g or estimated glomerular filtration rate <60 mL/min/1.73 m<sup>2</sup>.

\* Indicated *P* <.05 for comparing estimates in earlier years with the estimate in 2015-2018 within each stratum.

eTable 10. Trends in prevalence of statin use among US adults with diagnosed diabetes

|                                                                       | Adults with diagnosed diabetes, % (95% CI) <sup>a</sup> |                       |                       |                       |                       |                          |
|-----------------------------------------------------------------------|---------------------------------------------------------|-----------------------|-----------------------|-----------------------|-----------------------|--------------------------|
|                                                                       | 1999-2002<br>(n=989)                                    | 2003-2006<br>(n=1051) | 2007-2010<br>(n=1487) | 2011-2014<br>(n=1430) | 2015-2018<br>(n=1721) | P for trend <sup>b</sup> |
| Overall prevalence                                                    | 28.5 (24.7-32.3)*                                       | 43.6 (39.8-47.3)*     | 51.1 (48.4-53.7)*     | 56.0 (51.9-60.0)      | 55.5 (52.2-58.9)      | <.001                    |
| Age group, y                                                          |                                                         |                       |                       |                       |                       |                          |
| 18-44                                                                 | 12.5 (4.0-21.0)                                         | 26.8 (13.6-39.9)      | 30.6 (22.1-39.1)      | 23.2 (15.2-31.1)      | 20.3 (13.4-27.2)      | .58                      |
| 45-64                                                                 | 28.6 (20.3-36.9)*                                       | 41.5 (35.7-47.4)*     | 46.6 (41.4-51.8)*     | 56.7 (50.5-62.9)      | 58.8 (53.3-64.3)      | <.001                    |
| ≥65                                                                   | 34.0 (28.1-39.8)*                                       | 51.7 (46.3-57.1)*     | 63.3 (59.2-67.4)      | 66.6 (61.4-71.9)      | 64.2 (59.1-69.3)      | <.001                    |
| Sex                                                                   |                                                         |                       |                       |                       |                       |                          |
| Men                                                                   | 30.4 (25.9-34.9)*                                       | 46.3 (40.5-52.0)*     | 54.6 (52.1-57.2)      | 59.5 (55.2-63.7)      | 58.7 (54.1-63.3)      | <.001                    |
| Women                                                                 | 26.5 (19.5-33.4)*                                       | 41.1 (35.8-46.4)*     | 47.6 (43.6-51.6)      | 52.8 (47.3-58.2)      | 52.1 (46.7-57.4)      | <.001                    |
| Race/ethnicity <sup>c</sup>                                           |                                                         |                       |                       |                       |                       |                          |
| Non-Hispanic White                                                    | 35.1 (29.0-41.1)*                                       | 45.4 (39.8-51.0)*     | 55.4 (51.0-59.8)      | 59.6 (53.9-65.4)      | 58.5 (53.6-63.4)      | <.001                    |
| Non-Hispanic Black                                                    | 14.9 (10.3-19.5)*                                       | 39.9 (33.8-46.0)*     | 46.1 (40.0-52.3)      | 54.2 (49.1-59.3)      | 52.3 (48.3-56.3)      | <.001                    |
| Mexican American                                                      | 19.1 (13.0-25.2)*                                       | 33.2 (27.8-38.6)*     | 44.9 (39.8-49.9)      | 46.1 (37.8-54.4)      | 51.4 (45.8-56.9)      | <.001                    |
| Other                                                                 | 20.3 (10.8-29.7)*                                       | 46.6 (33.2-60.1)      | 45.8 (37.3-54.3)      | 50.2 (42.6-57.7)      | 53.0 (46.2-59.8)      | <.001                    |
| Education level <sup>d</sup>                                          |                                                         |                       |                       |                       |                       |                          |
| Less than High School                                                 | 24.8 (18.2-31.3)*                                       | 41.2 (35.2-47.3)*     | 48.4 (42.1-54.7)      | 52.2 (46.4-58.0)      | 52.3 (46.8-57.9)      | <.001                    |
| High school graduate                                                  | 28.8 (22.8-34.8)*                                       | 48.8 (41.1-56.4)      | 57.7 (51.0-64.3)      | 53.1 (43.2-63.0)      | 56.5 (51.3-61.6)      | <.001                    |
| Some college                                                          | 31.2 (24.2-38.2)*                                       | 39.7 (30.9-48.6)      | 50.4 (45.1-55.8)      | 60.4 (52.9-67.9)*     | 49.4 (44.3-54.4)      | <.001                    |
| College graduate or above                                             | 34.7 (22.6-46.7)*                                       | 46.1 (35.3-56.8)*     | 48.5 (41.0-56.0)*     | 57.1 (48.5-65.6)      | 66.7 (59.4-74.0)      | <.001                    |
| Weight group (body mass index range, kg/m <sup>2</sup> ) <sup>e</sup> |                                                         |                       |                       |                       |                       |                          |
| Normal weight (18.5-24.9)                                             | 23.0 (12.8-33.1)*                                       | 41.3 (31.6-51.0)*     | 40.9 (32.8-49.0)*     | 54.2 (47.0-61.4)      | 59.1 (52.7-65.5)      | <.001                    |
| Overweight (25.0-29.9)                                                | 35.9 (26.1-45.7)*                                       | 37.7 (30.4-45.0)*     | 49.7 (42.7-56.7)      | 53.1 (47.6-58.7)      | 53.5 (46.7-60.3)      | <.001                    |
| Class I obesity (30.0-34.9)                                           | 29.4 (21.0-37.9)*                                       | 44.0 (36.2-51.9)*     | 54.7 (49.8-59.6)      | 56.1 (48.8-63.3)      | 57.1 (49.8-64.4)      | <.001                    |
| Class II obesity (35.0-39.9)                                          | 20.7 (9.5-31.9)*                                        | 50.8 (42.8-58.8)      | 52.9 (45.7-60.1)      | 58.4 (46.8-70.0)      | 50.4 (42.3-58.5)      | .004                     |
| Class III obesity (≥40.0)                                             | 37.2 (23.6-50.8)*                                       | 49.6 (39.4-59.9)      | 53.2 (43.9-62.4)      | 64.4 (57.3-71.5)      | 54.8 (44.4-65.3)      | .04                      |
| Abdominal obesity status (waist circumference range, cm) <sup>f</sup> |                                                         |                       |                       |                       |                       |                          |
| No (≤102 cm in men, ≤88 cm in women)                                  | 31.2 (22.7-39.7)*                                       | 38.7 (28.9-48.5)*     | 45.6 (37.4-53.8)      | 51.1 (44.1-58.2)      | 54.7 (47.4-62.0)      | <.001                    |
| Yes (>102 cm in men, >88 cm in women)                                 | 29.3 (23.4-35.3)*                                       | 45.9 (40.7-51.2)*     | 53.6 (50.3-57.0)      | 57.0 (52.5-61.6)      | 55.4 (51.9-58.9)      | <.001                    |
| Insurance status <sup>g</sup>                                         |                                                         |                       |                       |                       |                       |                          |
| Uninsured                                                             | 10.2 (3.9-16.4)*                                        | 24.5 (10.8-38.1)      | 43.3 (33.0-53.6)      | 30.1 (17.4-42.8)      | 38.4 (23.2-53.6)      | <.001                    |
| Insured                                                               | 30.6 (26.5-34.8)*                                       | 45.6 (41.4-49.8)*     | 52.5 (49.8-55.3)*     | 59.1 (54.9-63.3)      | 57.4 (53.8-60.9)      | .01                      |
| Presence of complication <sup>h</sup>                                 |                                                         |                       |                       |                       |                       |                          |

|     |                   |                   |                  |                  |                  |       |
|-----|-------------------|-------------------|------------------|------------------|------------------|-------|
| No  | 22.9 (17.2-28.6)* | 36.5 (30.1-42.8)* | 50.2 (43.8-56.6) | 49.8 (44.5-55.1) | 51.3 (46.6-56.0) | <.001 |
| Yes | 32.1 (27.7-36.5)* | 46.7 (41.3-52.1)* | 53.4 (50.1-56.8) | 58.7 (53.1-64.3) | 58.7 (54.1-63.3) | <.001 |

<sup>a</sup> Diagnosed diabetes was defined based on self-report of diabetes diagnosis by a doctor or other health professional. Estimates were age standardized to all diagnosed diabetes cases other than during pregnancy in the National Health and Nutrition Examination Survey 1999-2018 years using the age groups of 18-44 years, 45-64 years, and 65 years or greater.

<sup>b</sup> Assuming a linear trend.

<sup>c</sup> Race/ethnicity was determined by self-report in fixed categories. Non-Hispanic Asians were not available before 2011 due to the survey design and thus estimates could not be presented separately. There was no missing data. All other racial and ethnic groups were grouped as “Other”.

<sup>d</sup> Sixteen participants refused to report or did not know their education level.

<sup>e</sup> Body mass index was computed by dividing weight in kilograms by height in meters squared. Estimates for those with body mass index <18.5 kg/m<sup>2</sup> were not presented due to small sample size. Body mass index was missing for 228 participants.

<sup>f</sup> Waist circumference was missing for 574 participants.

<sup>g</sup> Insurance status was missing for 27 participants. For the uninsured subgroup, an interaction term with age was not included when calculating the age-standardized estimate in 1999-2002 because only 8 participants were on statin.

<sup>h</sup> Complications were defined as having self-reported cardiovascular disease (congestive heart failure, coronary heart disease, heart attack or stroke) or retinopathy or urine albumin-to-creatinine ratio  $\geq 30$  mg/g or estimated glomerular filtration rate <60 mL/min/1.73 m<sup>2</sup>.

\* Indicated  $P < .05$  for comparing estimates in earlier years with the estimate in 2015-2018 within each stratum.

eTable 11. Factors associated with achieving selected risk factor control goals among US adults with diagnosed diabetes, 1999-2018

|                                                           | Adults with diagnosed diabetes, Odds ratio (95% CI) <sup>a,b</sup> |                      |                              |                     |                     |                     |                     |                     |                                                                        |                                                                        |
|-----------------------------------------------------------|--------------------------------------------------------------------|----------------------|------------------------------|---------------------|---------------------|---------------------|---------------------|---------------------|------------------------------------------------------------------------|------------------------------------------------------------------------|
| Characteristics                                           | HbA1c <7.0%                                                        | HbA1c <8.0%          | Individualized HbA1c targets | BP <130/80 mm Hg    | BP <140/90 mm Hg    | LDL-C <70 mg/dL     | LDL-C <100 mg/dL    | On statin           | Individualized HbA1c targets and BP <130/80 mm Hg and LDL-C <100 mg/dL | Individualized HbA1c targets and BP <140/90 mm Hg and LDL-C <100 mg/dL |
| No. of adults with diagnosed diabetes <sup>c</sup>        | 5509                                                               | 5509                 | 5509                         | 5555                | 5555                | 2285                | 2285                | 5726                | 2222                                                                   | 2222                                                                   |
| Age group, y                                              |                                                                    |                      |                              |                     |                     |                     |                     |                     |                                                                        |                                                                        |
| 18-44                                                     | 0.70<br>(0.54-0.91)                                                | 0.34<br>(0.25-0.46)  | 0.25<br>(0.19-0.33)          | 1.99<br>(1.52-2.60) | 3.22<br>(2.34-4.44) | 0.19<br>(0.10-0.37) | 0.40<br>(0.27-0.58) | 0.25<br>(0.19-0.33) | 0.32<br>(0.16-0.63)                                                    | 0.40<br>(0.24-0.65)                                                    |
| 45-64                                                     | 0.63<br>(0.53-0.75)                                                | 0.47<br>(0.38-0.58)  | 0.42<br>(0.34-0.52)          | 1.74<br>(1.46-2.08) | 1.88<br>(1.56-2.27) | 0.44<br>(0.30-0.63) | 0.53<br>(0.40-0.71) | 0.80<br>(0.68-0.94) | 0.87 (0.59-1.28)                                                       | 0.70<br>(0.50-0.99)                                                    |
| ≥65                                                       | 1 [reference]                                                      | 1 [reference]        | 1 [reference]                | 1 [reference]       | 1 [reference]       | 1 [reference]       | 1 [reference]       | 1 [reference]       | 1 [reference]                                                          | 1 [reference]                                                          |
| Sex                                                       |                                                                    |                      |                              |                     |                     |                     |                     |                     |                                                                        |                                                                        |
| Men                                                       | 1 [reference]                                                      | 1 [reference]        | 1 [reference]                | 1 [reference]       | 1 [reference]       | 1 [reference]       | 1 [reference]       | 1 [reference]       | 1 [reference]                                                          | 1 [reference]                                                          |
| Women                                                     | 1.31<br>(1.13-1.52)                                                | 1.16<br>(0.99-1.36)  | 1.35<br>(1.16-1.58)          | 1.08<br>(0.91-1.27) | 0.92<br>(0.79-1.09) | 0.65<br>(0.47-0.90) | 0.66<br>(0.53-0.82) | 0.75<br>(0.64-0.89) | 0.65<br>(0.49-0.87)                                                    | 0.73<br>(0.57-0.93)                                                    |
| Race/ethnicity <sup>d</sup>                               |                                                                    |                      |                              |                     |                     |                     |                     |                     |                                                                        |                                                                        |
| Non-Hispanic White                                        | 1 [reference]                                                      | 1 [reference]        | 1 [reference]                | 1 [reference]       | 1 [reference]       | 1 [reference]       | 1 [reference]       | 1 [reference]       | 1 [reference]                                                          | 1 [reference]                                                          |
| Non-Hispanic Black                                        | 0.78<br>(0.65-0.94)                                                | 0.65<br>(0.54-0.79)  | 0.64<br>(0.53-0.77)          | 0.65<br>(0.55-0.78) | 0.56<br>(0.46-0.68) | 1.08<br>(0.80-1.46) | 0.76<br>(0.57-1.01) | 0.74<br>(0.62-0.89) | 0.60<br>(0.40-0.90)                                                    | 0.59<br>(0.42-0.82)                                                    |
| Mexican American                                          | 0.65<br>(0.53-0.81)                                                | 0.61<br>(0.47-0.78)  | 0.59<br>(0.47-0.73)          | 1.04<br>(0.84-1.28) | 0.98<br>(0.77-1.26) | 1.06<br>(0.66-1.69) | 0.64<br>(0.47-0.87) | 0.80<br>(0.65-0.98) | 0.48<br>(0.31-0.77)                                                    | 0.50<br>(0.34-0.73)                                                    |
| Other                                                     | 0.82<br>(0.68-1.004)                                               | 0.78<br>(0.61-1.002) | 0.79 (0.61-1.01)             | 1.07<br>(0.87-1.32) | 1.02<br>(0.80-1.31) | 1.42<br>(0.99-2.04) | 0.92<br>(0.64-1.33) | 0.83<br>(0.64-1.06) | 0.80<br>(0.49-1.32)                                                    | 0.85<br>(0.54-1.33)                                                    |
| Education level                                           |                                                                    |                      |                              |                     |                     |                     |                     |                     |                                                                        |                                                                        |
| Less than High School                                     | 1 [reference]                                                      | 1 [reference]        | 1 [reference]                | 1 [reference]       | 1 [reference]       | 1 [reference]       | 1 [reference]       | 1 [reference]       | 1 [reference]                                                          | 1 [reference]                                                          |
| High school graduate                                      | 1.02<br>(0.83-1.26)                                                | 1.00<br>(0.81-1.24)  | 1.09<br>(0.88-1.34)          | 1.04<br>(0.85-1.26) | 1.03<br>(0.85-1.26) | 0.97<br>(0.61-1.53) | 1.06<br>(0.76-1.49) | 1.15<br>(0.93-1.41) | 1.01<br>(0.66-1.55)                                                    | 1.04<br>(0.73-1.50)                                                    |
| Some college                                              | 1.10<br>(0.88-1.38)                                                | 1.03<br>(0.82-1.28)  | 0.97<br>(0.79-1.18)          | 1.13<br>(0.92-1.38) | 1.11<br>(0.91-1.36) | 1.17<br>(0.82-1.66) | 1.19<br>(0.89-1.59) | 1.01<br>(0.83-1.23) | 0.99<br>(0.64-1.55)                                                    | 1.04<br>(0.73-1.47)                                                    |
| College graduate or above                                 | 1.13<br>(0.91-1.41)                                                | 1.34<br>(1.02-1.76)  | 1.26<br>(0.98-1.61)          | 1.31<br>(1.05-1.64) | 1.16<br>(0.89-1.51) | 1.41<br>(0.84-2.36) | 1.53<br>(1.05-2.24) | 1.30<br>(1.03-1.64) | 1.23<br>(0.78-1.94)                                                    | 1.22<br>(0.80-1.88)                                                    |
| Weight group (BMI range, kg/m <sup>2</sup> ) <sup>e</sup> |                                                                    |                      |                              |                     |                     |                     |                     |                     |                                                                        |                                                                        |
| Normal weight (18.5-24.9)                                 | 1 [reference]                                                      | 1 [reference]        | 1 [reference]                | 1 [reference]       | 1 [reference]       | 1 [reference]       | 1 [reference]       | 1 [reference]       | 1 [reference]                                                          | 1 [reference]                                                          |
| Overweight (25.0-29.9)                                    | 1.05<br>(0.78-1.40)                                                | 1.06<br>(0.78-1.43)  | 1.10<br>(0.82-1.47)          | 1.35<br>(0.98-1.86) | 1.26<br>(0.93-1.70) | 1.19<br>(0.62-2.29) | 0.89<br>(0.58-1.37) | 1.02<br>(0.77-1.34) | 1.49<br>(0.79-2.82)                                                    | 1.87<br>(1.07-3.26)                                                    |
| Class I obesity (30.0-34.9)                               | 0.89<br>(0.63-1.27)                                                | 1.06<br>(0.75-1.51)  | 0.99<br>(0.70-1.40)          | 1.38<br>(0.96-1.97) | 1.74<br>(1.25-2.44) | 1.34<br>(0.65-2.75) | 1.17<br>(0.73-1.89) | 1.19<br>(0.84-1.71) | 1.64<br>(0.80-3.37)                                                    | 2.62<br>(1.40-4.90)                                                    |



|                                         |                     |                     |                     |                     |                     |                     |                      |                     |                     |                     |
|-----------------------------------------|---------------------|---------------------|---------------------|---------------------|---------------------|---------------------|----------------------|---------------------|---------------------|---------------------|
| Class II obesity (35.0-39.9)            | 0.90<br>(0.62-1.31) | 1.10<br>(0.75-1.60) | 1.08<br>(0.75-1.57) | 0.99<br>(0.65-1.50) | 1.30<br>(0.89-1.89) | 1.22<br>(0.56-2.67) | 1.01<br>(0.62-1.63)  | 1.12<br>(0.78-1.61) | 1.34<br>(0.63-2.86) | 2.35<br>(1.18-4.68) |
| Class III obesity (≥40.0)               | 0.80<br>(0.54-1.20) | 1.06<br>(0.69-1.64) | 0.90<br>(0.59-1.36) | 1.14<br>(0.76-1.71) | 1.40<br>(0.94-2.10) | 1.44<br>(0.65-3.21) | 1.44<br>(0.85-2.44)  | 1.40<br>(0.99-1.99) | 1.14<br>(0.47-2.80) | 2.66<br>(1.27-5.61) |
| Abdominal obesity status (WC range, cm) |                     |                     |                     |                     |                     |                     |                      |                     |                     |                     |
| No (≤102 in men, ≤88 in women)          | 1 [reference]        | 1 [reference]       | 1 [reference]       | 1 [reference]       |
| Yes (>102 in men, >88 in women)         | 1.04<br>(0.78-1.39) | 0.97<br>(0.70-1.33) | 1.04<br>(0.79-1.37) | 0.89<br>(0.67-1.17) | 0.72<br>(0.54-0.95) | 0.91<br>(0.52-1.58) | 0.95<br>(0.66-1.36)  | 1.07<br>(0.80-1.42) | 1.15<br>(0.65-2.04) | 0.70<br>(0.43-1.11) |
| Insurance status                        |                     |                     |                     |                     |                     |                     |                      |                     |                     |                     |
| Uninsured                               | 0.84<br>(0.66-1.07) | 0.67<br>(0.52-0.85) | 0.81<br>(0.64-1.02) | 0.96<br>(0.76-1.22) | 0.74<br>(0.56-0.97) | 0.79<br>(0.50-1.26) | 0.71<br>(0.50-0.995) | 0.37<br>(0.29-0.46) | 0.89<br>(0.48-1.66) | 0.74<br>(0.45-1.22) |
| Insured                                 | 1 [reference]        | 1 [reference]       | 1 [reference]       | 1 [reference]       |
| Presence of complications <sup>f</sup>  |                     |                     |                     |                     |                     |                     |                      |                     |                     |                     |
| No                                      | 1 [reference]        | 1 [reference]       | 1 [reference]       | 1 [reference]       |
| Yes                                     | 0.64<br>(0.54-0.77) | 0.60<br>(0.49-0.73) | 1.40<br>(1.18-1.66) | 0.64<br>(0.55-0.76) | 0.51<br>(0.42-0.62) | 1.24<br>(0.89-1.74) | 1.04<br>(0.82-1.32)  | 1.41<br>(1.19-1.66) | 0.97<br>(0.70-1.34) | 0.96<br>(0.73-1.25) |

Abbreviations: BMI, body mass index; BP, blood pressure; HbA1c, hemoglobin A1c; LDL-C, low-density lipoprotein cholesterol; WC, waist circumference.

<sup>a</sup> Diagnosed diabetes was defined as having self-report of diabetes diagnosis by a doctor or other health professional.

<sup>b</sup> Logistic regressions were used with all shown risk factors included as covariates. Survey weights and design variables were considered.

<sup>c</sup> Unweighted number of adults with diagnosed diabetes.

<sup>d</sup> Race/ethnicity was determined by self-report in fixed categories. Non-Hispanic Asians were not available before 2011 due to the survey design and thus estimates could not be presented separately. All other racial and ethnic groups were grouped as “Other”.

<sup>e</sup> BMI was computed by dividing weight in kilograms by height in meters squared. Estimates are not shown for adults with BMI <18.5 kg/m<sup>2</sup> (i.e., underweight) due to small sample size (n=19).

<sup>f</sup> Complications were defined as having self-reported cardiovascular disease (congestive heart failure, coronary heart disease, heart attack or stroke) or retinopathy or urine albumin-to-creatinine ratio ≥ 30 mg/g or estimated glomerular filtration rate <60 mL/min/1.73 m<sup>2</sup>.

eTable 12. Trends in prevalence of diabetes including cases identified by 2-hour plasma glucose, 2005-2016<sup>a</sup>

|                                                 | 2005-2006        | 2007-2008        | 2009-2010        | 2011-2012        | 2013-2014        | 2015-2016        | Change per 2-year cycle <sup>b</sup> | P for trend <sup>b</sup> |
|-------------------------------------------------|------------------|------------------|------------------|------------------|------------------|------------------|--------------------------------------|--------------------------|
| Diabetes <sup>c</sup>                           | 13.5 (11.8-15.2) | 15.4 (13.2-17.5) | 14.9 (12.8-17.0) | 14.5 (12.6-16.5) | 14.3 (13.5-15.2) | 15.7 (13.9-17.4) | 1.1 (-2.3 to 4.6)                    | .44                      |
| Diagnosed diabetes <sup>d</sup>                 | 8.0 (7.0-8.9)    | 8.8 (7.4-10.2)   | 8.5 (7.5-9.6)    | 9.4 (8.1-10.6)   | 10.0 (9.1-10.9)  | 10.6 (9.1-12.1)  | 5.8 (3.9 to 7.8)                     | .001                     |
| Undiagnosed diabetes <sup>e</sup>               | 5.5 (4.3-6.8)    | 6.6 (5.4-7.7)    | 6.4 (5.0-7.8)    | 5.1 (3.9-6.3)    | 4.3 (3.8-4.9)    | 5.0 (4.1-6.0)    | -7.1 (-15.1 to 1.7)                  | .09                      |
| % of diabetes that was undiagnosed <sup>f</sup> | 40.4 (34.2-46.6) | 42.3 (38.0-46.7) | 42.8 (38.4-47.1) | 35.3 (29.7-40.9) | 30.3 (26.6-34.1) | 31.8 (26.2-37.4) | -7.5 (-13.7 to -0.9)                 | .04                      |

<sup>a</sup> All estimates were age standardized to the 2017-2018 National Health and Nutrition Examination Survey non-pregnant adult population using the age groups of 18-44 years, 45-64 years, and 65 years or greater.

<sup>b</sup> Estimated using the Joinpoint Regression Program.

<sup>c</sup> Included both diagnosed and undiagnosed diabetes.

<sup>d</sup> Self-report of diabetes diagnosis by a doctor or other health professional.

<sup>e</sup> Hemoglobin A1c level of 6.5% or higher or fasting plasma glucose level of 126 mg/dL or higher or 2-hour plasma glucose level of 200 mg/dL or higher among those without self-reported diabetes.

<sup>f</sup> Estimates were age standardized to all diabetes cases in 2017-2018 other than during pregnancy in the National Health and Nutrition Examination Survey using the age groups of 18-44 years, 45-64 years, and 65 years or greater.
